# Supplementary material for: SARS-CoV-2-mediated dysregulation of metabolism and autophagy uncovers host-targeting antivirals
Source: PubMed Central journal article supplement (PMC8217552; doi:10.1038/s41467-021-24007-w), 2021-06-21
Supplement: 41467_2021_24007_MOESM1_ESM.pdf [file 41467_2021_24007_MOESM1_ESM.pdf]

## Supplementary data (Figures and Tables)

### “SARS-CoV-2-mediated dysregulation of metabolism and autophagy uncovers host-targeting antivirals” (Gassen et al.)

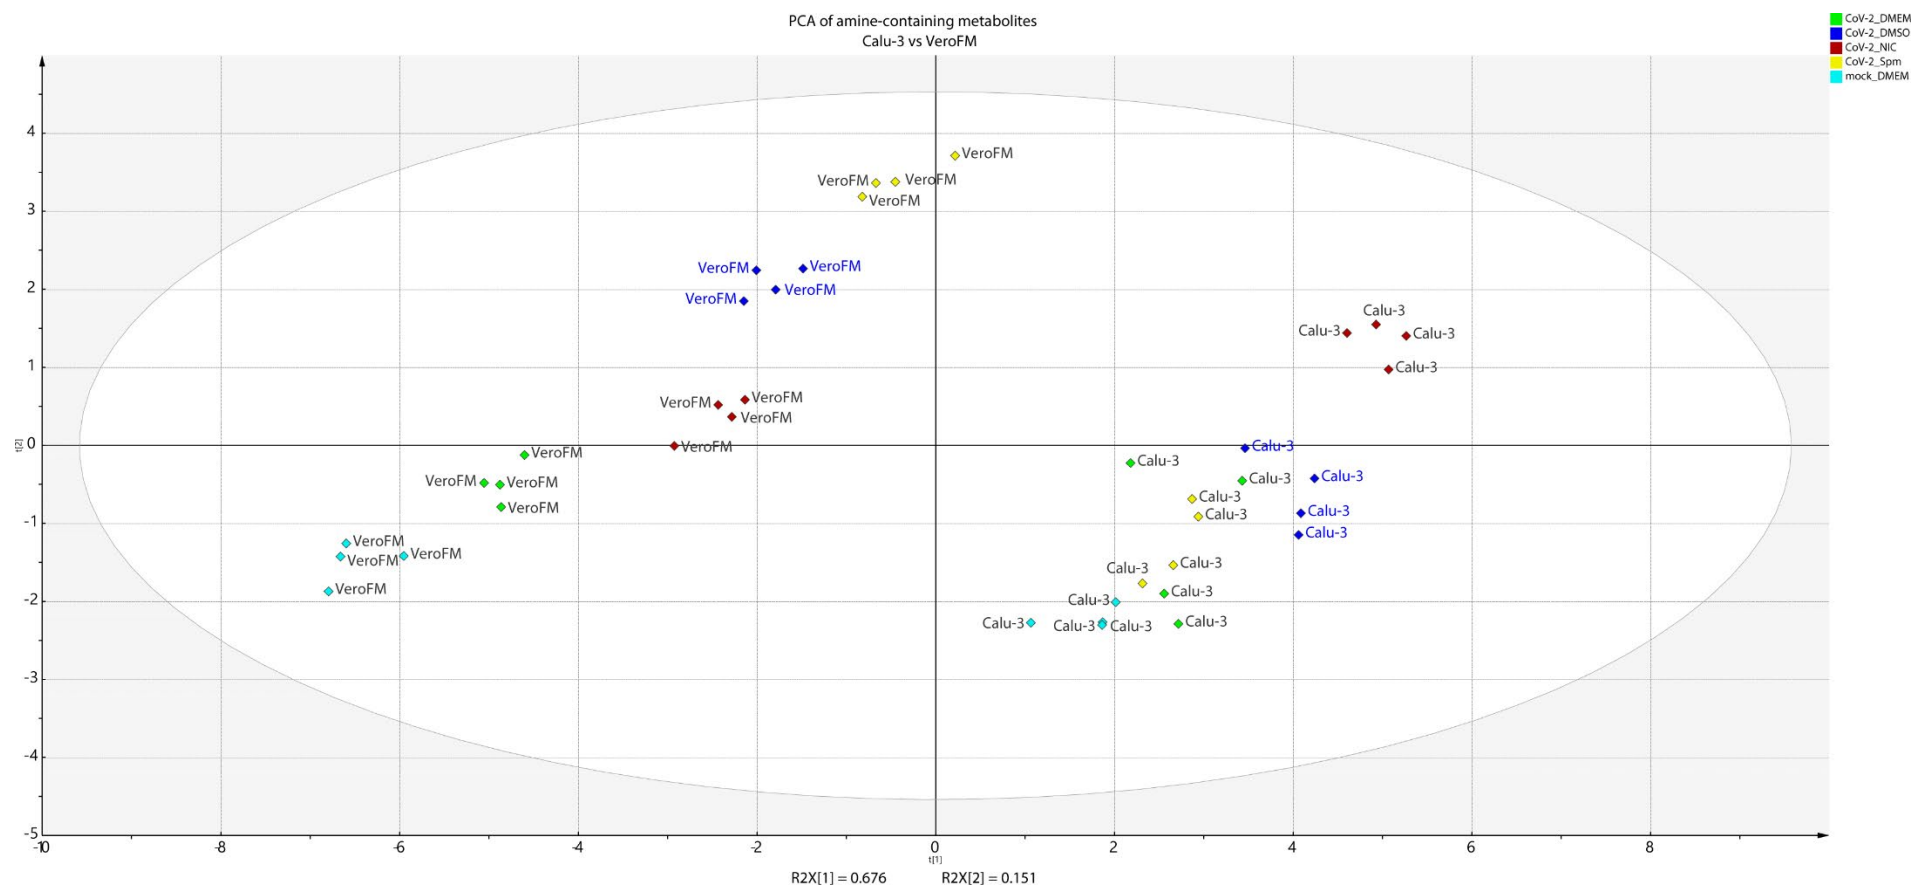

**Supplementary Fig. 1.** Principal component analysis (PCA) comparing VeroFM and Calu-3 cells in mock (mock\_DMEM), SARS-CoV-2-infected (CoV-2 DMEM, 24 h p.i.) and SARS-CoV-2-infected and treated (with either drug vehicle (CoV-2 DMSO), niclosamide (CoV-2 NIC) or spermine (CoV-2 Spm)). The variables used for this PCA analysis were all identified amine-containing metabolites ( $n = 4$  per group, one experiment). NIC and Spm data refer to **Fig. 5**. For PCA analysis log<sub>10</sub> transformed and pareto scaled and mean-centered peak areas of all samples were analyzed using SIMCA 13 (Umetrics).

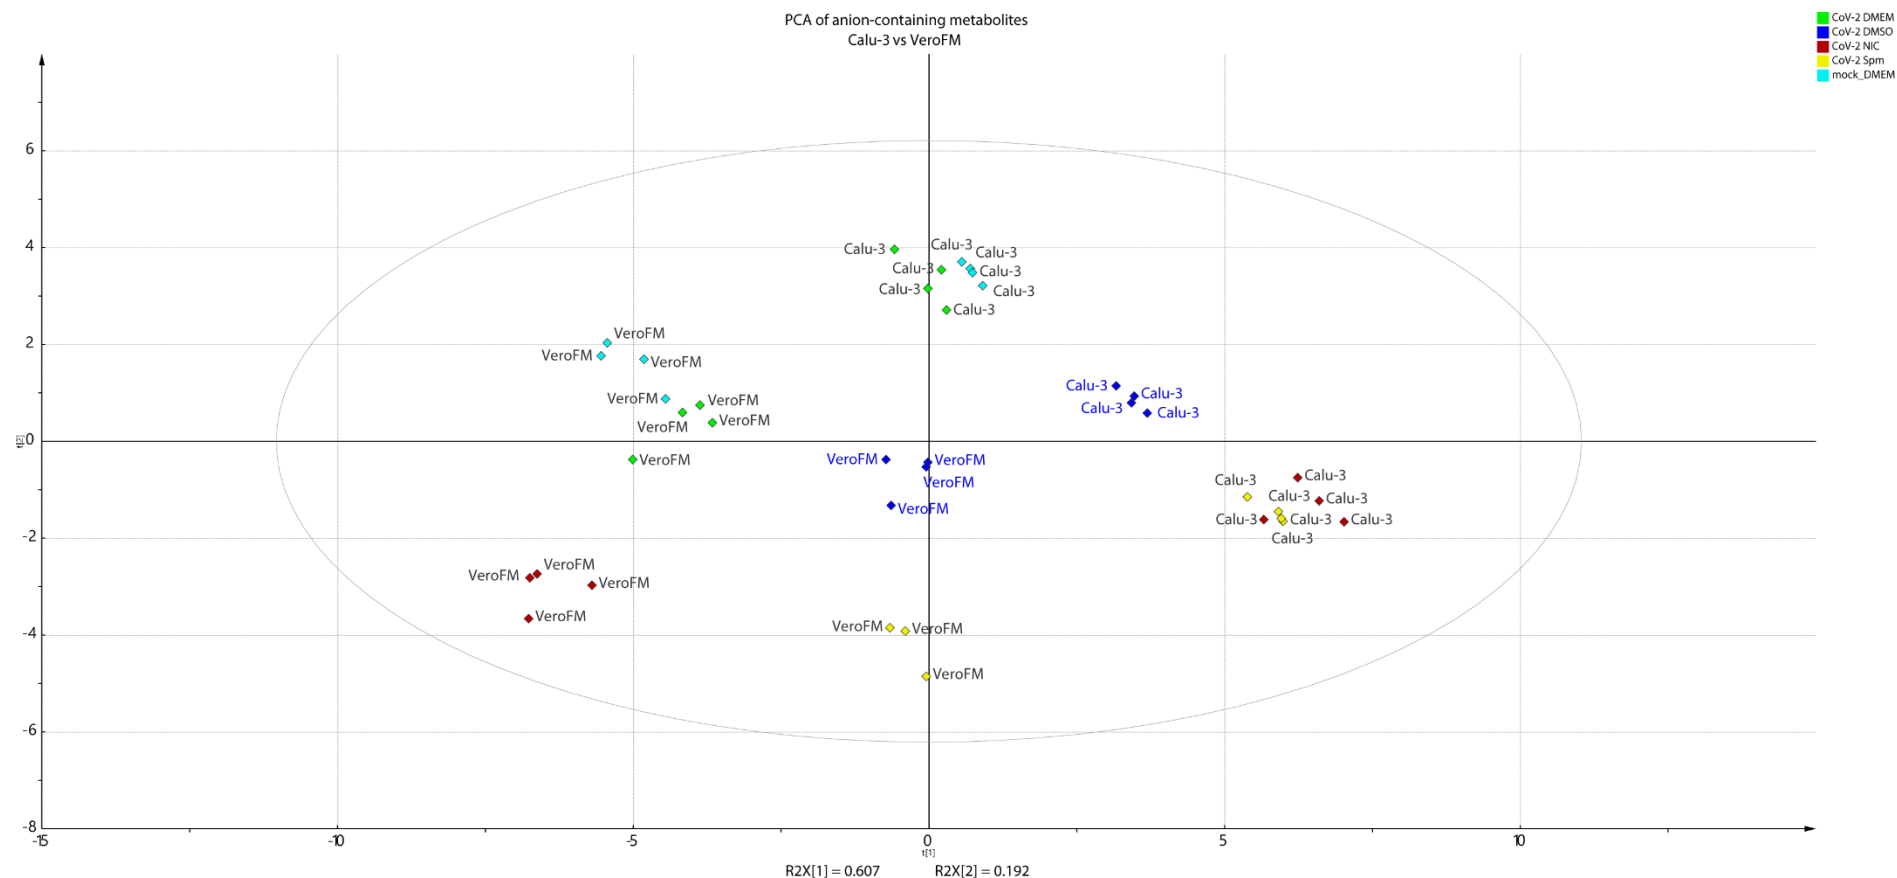

**Supplementary Fig. 2.** Principal component analysis (PCA) comparing VeroFM and Calu-3 cells in mock (mock\_DMEM), SARS-CoV-2-infected (CoV-2 DMEM, 24 h p.i.) and SARS-CoV-2-infected and treated (with either drug vehicle (CoV-2 DMSO), niclosamide (CoV-2 NIC) or spermine (CoV-2 Spm)). The variables used for the PCA analysis were all identified anion-containing metabolites ( $n = 4$  per group, except  $n = 3$  for VeroFM CoV-2 Spm, one experiment). NIC and Spm data refer to **Fig. 5**. For PCA analysis log<sub>10</sub> transformed and pareto scaled and mean-centered peak areas of all samples were analyzed using SIMCA 13 (Umetrics).

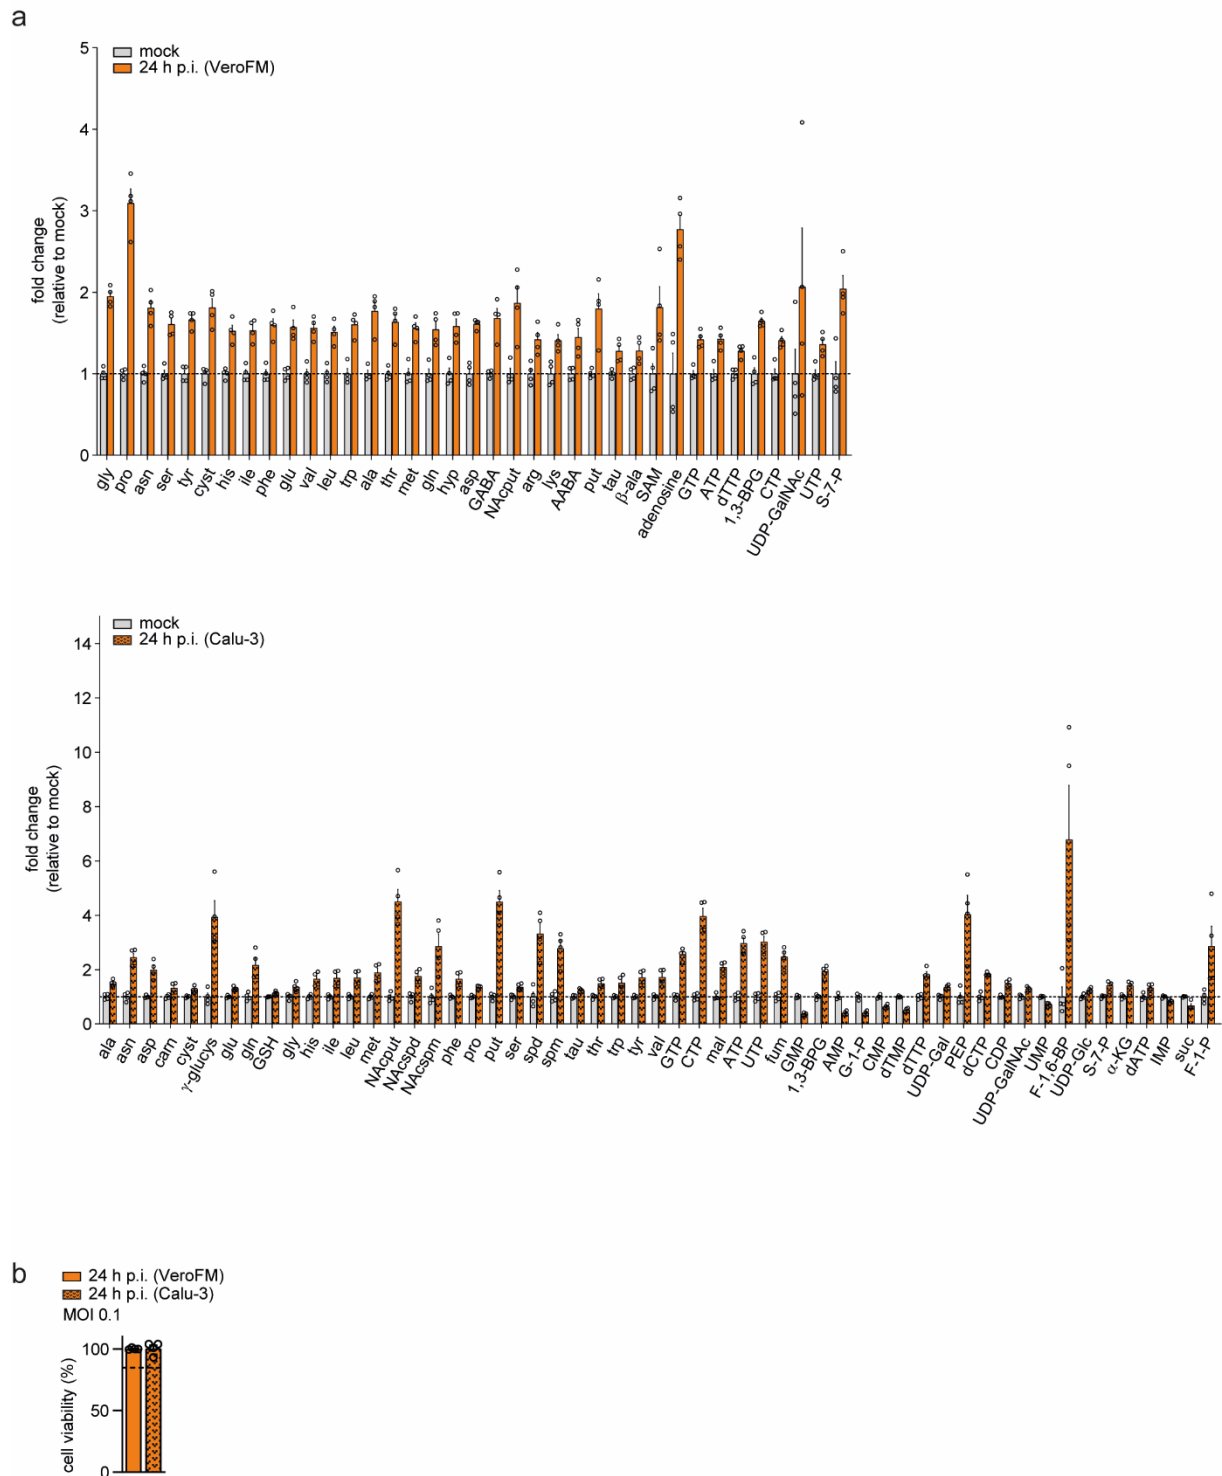

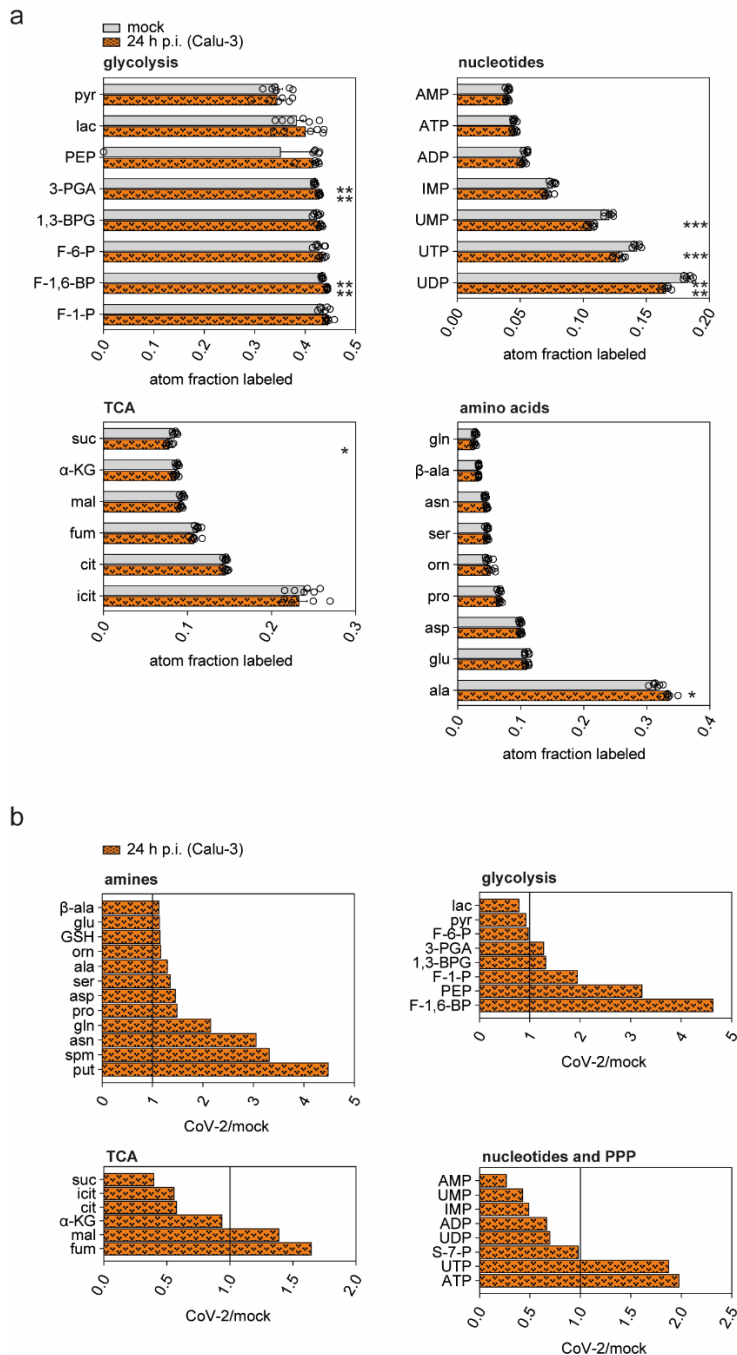

**Supplementary Fig. 4. a**  $^{13}\text{C}$  isotope enrichment using  $\text{U-}^{13}\text{C}_6$ -labeled glucose as tracer in SARS-CoV-2-infected Calu-3 cells. Bar charts display the mean with SEM of the fraction of  $^{13}\text{C}$ -labeled isotopes (atom fraction labeled in %) of each significantly altered metabolite analyzed in mock- and SARS-CoV-2-infected cells. Metabolites are assigned to their class or the metabolic pathway with which they are associated (glycolysis, TCA) or their metabolite class (nucleotides, amino acids). **b** Visualization of ratios of  $^{13}\text{C}$  atom fraction labeling-corrected pool sizes of SARS-CoV-2-infected/mock-treated Calu-3 cells. Atom fraction corrected metabolite areas of the displayed metabolites were obtained by multiplying the cell-count-normalized metabolite areas with the atom fraction factor providing the  $^{13}\text{C}$  isotope portion of each visualized compounds. Ratios  $>1$  indicate increased isotope enrichment in the SARS-CoV-2-infected cells, while ratios  $<1$  hint towards decreased isotope enrichment in SARS-CoV-2-infected cells. Metabolites are organized according to their metabolite class or pathway. For **a-b**  $n = 6$  for mock and SARS-CoV-2-infected cells (one experiment). All p-values were determined by a two-way ANOVA and Tukey's post hoc test with FDR correction.  $p \leq 0.05$  (\*),  $p \leq 0.01$  (\*\*),  $p \leq 0.001$  (\*\*\*),  $p \leq 0.0001$  (\*\*\*\*),  $p > 0.05$  (not significant, ns). **Abbreviations:** 1,3-BPG, 1,3-bisphosphoglyceric acid; 3-PGA, 3-phosphoglyceric acid;  $\alpha$ -KG,  $\alpha$ -ketoglutarate; ADP, adenosine diphosphate; ala, alanine; AMP, adenosine monophosphate; asn, asparagine; asp, asparagine; ATP, adenosine triphosphate; cit, citric acid; F-1-P, fructose 1-phosphate; F-6-P, fructose 6-phosphate; F-1,6-BP, fructose 1,6-bisphosphate; fum, fumarate; gln, glutamine; glu, glutamic acid; GSH, glutathione (reduced); icit, isocitric acid; IMP, inosine monophosphate; lac, lactic acid; mal, malic acid; orn, ornithine; PEP, phosphoenolpyruvic acid; pro, proline; put, putrescine; pyr, pyruvic acid; S-7-P, sedoheptulose-7-phosphate; ser, serine; spm, spermine; suc, succinate; UDP, uridine diphosphate; UMP, uridine monophosphate; UTP, uridine triphosphate.

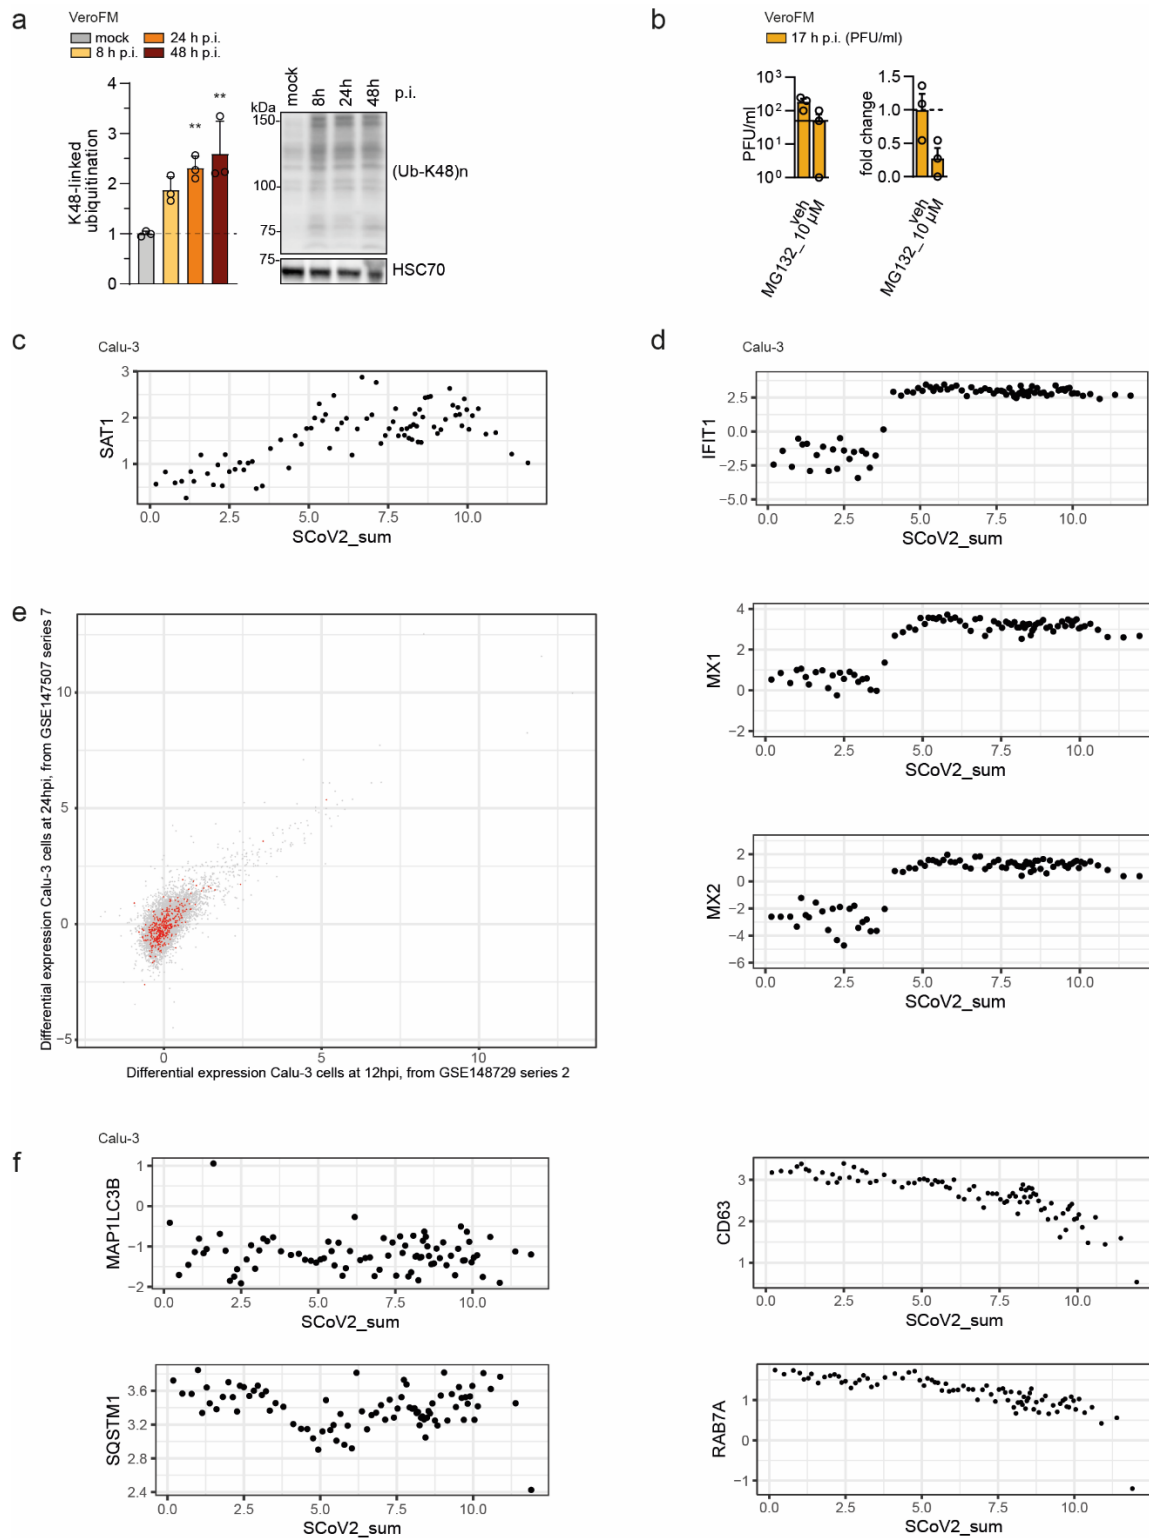

**Supplementary Fig. 5.** **a** Western blot analysis of K48-ubiquitinated proteins after SARS-CoV-2 infection in VerofM cells; HSC70 served as a loading control.  $n = 3$ , mean with SEM, one experiment. P-values were determined by one-way ANOVA, Bonferroni post hoc. **b** SARS-CoV-2 propagation (PFU/ml) in infected VerofM cells (MOI 0.0005) in response to 10  $\mu$ M MG132 treatment (5 hours) or vehicle (DMSO) control 17 hours post infection.  $n = 3$ , mean with SEM, one experiment, Student t test  $p=0.3$ . **c-d** Comparison of *SAT1*, *IFIT1*, *MX1*, and *MX2* transcript levels with SARS-CoV-2 signatures in Calu-3 cells (SCoV2\_sum). **e** The mRNA expression levels of TFEB-regulated genes are downregulated in SARS-CoV-2-infected Calu-3 cells. Differential expression values were calculated for SARS-CoV-2-infected Calu-3 cells compared to mock-treated cells using published RNA-sequencing datasets (GSE148729 and GSE147507). Shown are differential expression values for all genes (gray) and 399 TFEB target genes (red) **f** Comparison of *MAP1LC3B*, *CD63*, *SQSTM1*, and *RAB7A* transcript levels with SARS-CoV-2 signatures (SCoV2\_sum).  $p \leq 0.05$  (\*),  $p \leq 0.01$  (\*\*),  $p \leq 0.001$  (\*\*\*),  $p \leq 0.0001$  (\*\*\*\*),  $p > 0.05$  (not significant, ns).

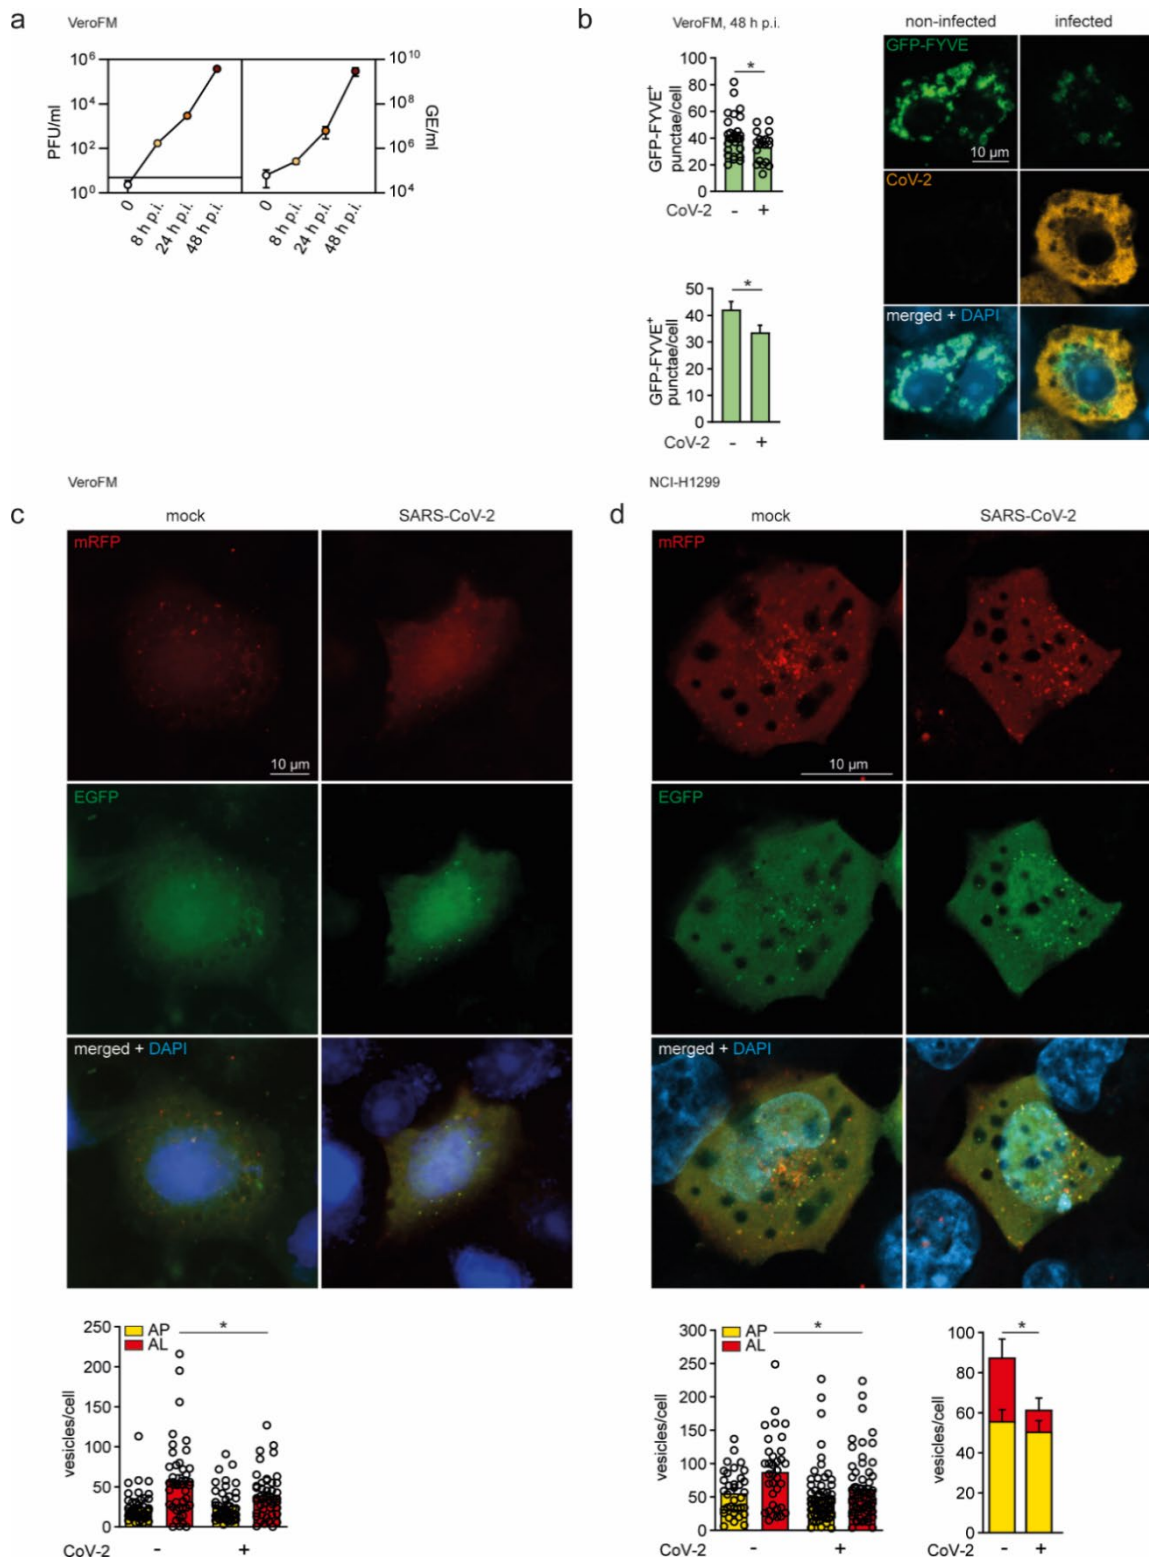

**Supplementary Fig. 6.** **a** Growth kinetics of SARS-CoV-2 in VeroFM cells.  $n = 3$ , mean with SEM, one experiment. **b** Quantification of GFP-FYVE punctae in SARS-CoV-2-infected and uninfected VeroFM cells; micrographs representative of those used for quantification 48 hours post infection.  $n = 27$  cells (-CoV-2),  $n = 19$  cells (+CoV-2), unpaired t test, mean with SEM. **c-d** Quantification of autophagolysosomes (ALs, defined as mRFP<sup>+</sup> EGFP<sup>+</sup> punctae) and autophagosomes (APs, defined as mRFP<sup>+</sup> EGFP<sup>-</sup> punctae) using tandem fluorescently-tagged LC3 in mock- and SARS-CoV-2-infected VeroFM (**c**:  $n = 44$  cells (CoV-2; mock),  $n = 46$  cells (CoV-2)), two-way ANOVA, Tukey's post hoc test, mean with SEM) and NCI-H1299 cells (**d**:  $n = 35$  cells (CoV-2; mock),  $n = 64$  cells (CoV-2)), two-way ANOVA, Tukey's post hoc test, mean with SEM); micrographs representative of those used for quantification. Lower right image in **c** is also shown in **Fig. 2b** in higher magnification. Vesicle/cell graph in **c** is shown without individual data points in **Fig. 2b**.  $p \leq 0.05$  (\*),  $p \leq 0.01$  (\*\*),  $p \leq 0.001$  (\*\*\*),  $p \leq 0.0001$  (\*\*\*\*),  $p > 0.05$  (not significant, ns).

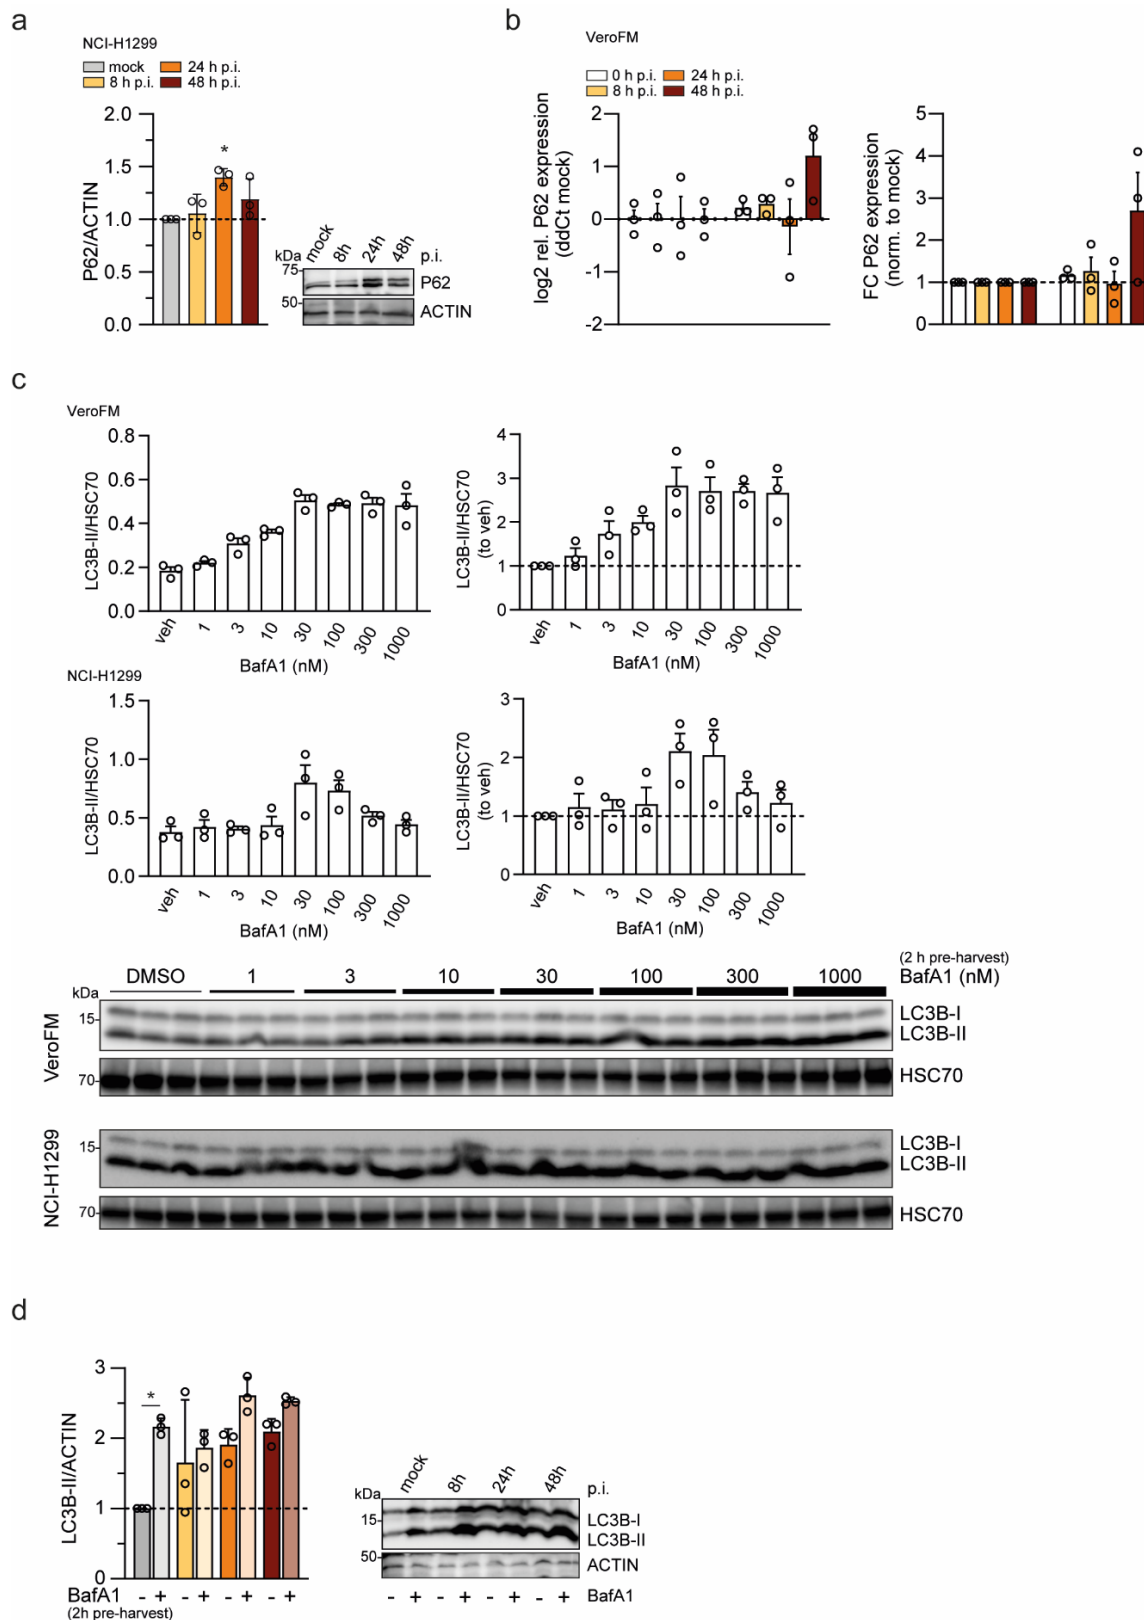

**Supplementary Fig. 7. a** Accumulation of autophagy marker P62 in SARS-CoV-2-infected NCI-H1299 cells. P-values were determined by one-way ANOVA, Bonferroni post hoc. **b** P62/*SQSTM1* mRNA transcript expression in uninfected (left, ddCt) or SARS-CoV-2 infected (right, ddCt normalized to mock) VeroFM cells at 8, 24, and 48 hours post infection. **c** Western blot analysis of LC3B-II levels relative to HSC70 loading control, in response to increasing concentrations of BafA1 (1-1000 nM) in VeroFM and NCI-H1299 cells for 2 hours. **d** Elevated LC3B-II levels in SARS-CoV-2-infected and bafilomycin A1 (BafA1)-pretreated NCI-H1299 cells indicate virus-induced autophagic flux inhibition. In all panels, error bars denote SEM derived from  $n = 3$  biologically independent samples from one experiment. P-values were determined by two-way ANOVA, Sidak post hoc.  $p \leq 0.05$  (\*),  $p \leq 0.01$  (\*\*),  $p \leq 0.001$  (\*\*\*),  $p \leq 0.0001$  (\*\*\*\*),  $p > 0.05$  (not significant, ns).

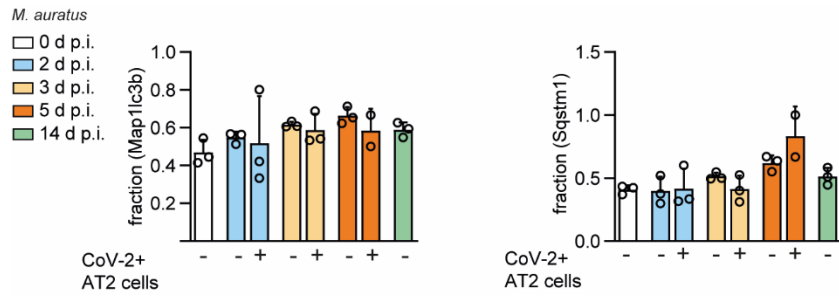

**Supplementary Fig. 8.** *Map1lc3b* and *Sqstm1* transcript levels in SARS-CoV-2-infected hamsters. Homogenized lung tissues of hamsters (*M. auratus*) were applied to single cell sequencing analysis at 0, 2, 3, 5, and 14 days post infection with SARS-CoV-2. Comparable *Map1lc3b* and *Sqstm1* transcript levels were identified in SARS-CoV-2-infected vs non-infected hamster lung AT2 cells. Of note, at time points 0 and 14 days post infection only uninfected AT2 cells were detected precluding a comparison. The published RNA-sequencing datasets can be found at GSE162208.  $n = 3$ , mean with SD from one experiment. (Exception:  $n = 2$  for *Map1lc3b* and *Sqstm1* at 5 d p.i.). Comparisons were tested by two-way ANOVA, Tukey's post hoc test. None of the relevant comparisons (day 0 vs days 2-14; mock vs infected animals) were significant.



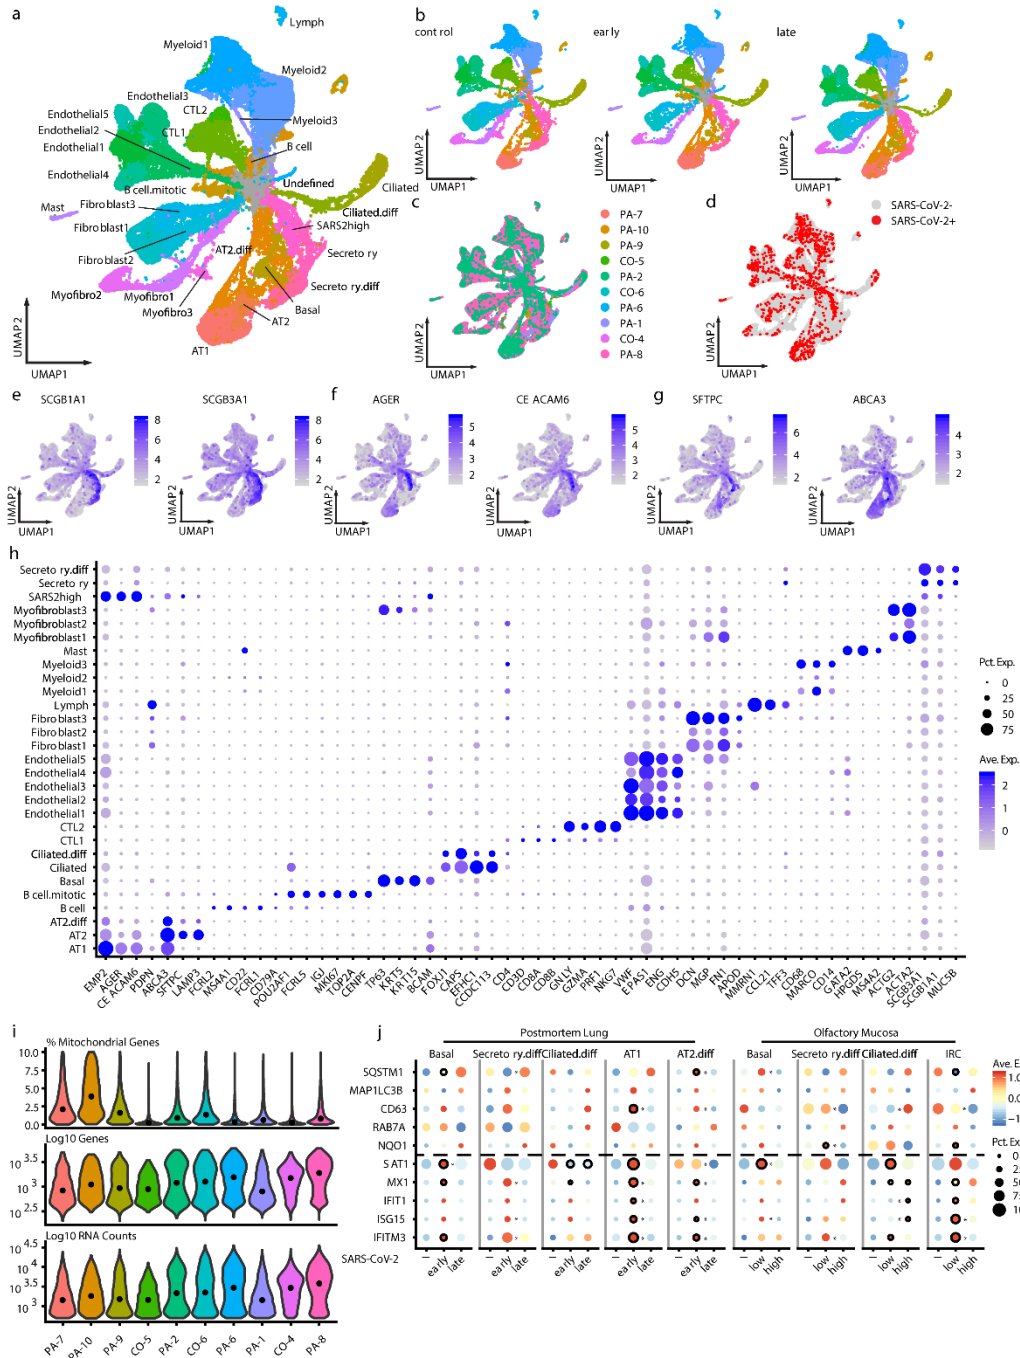

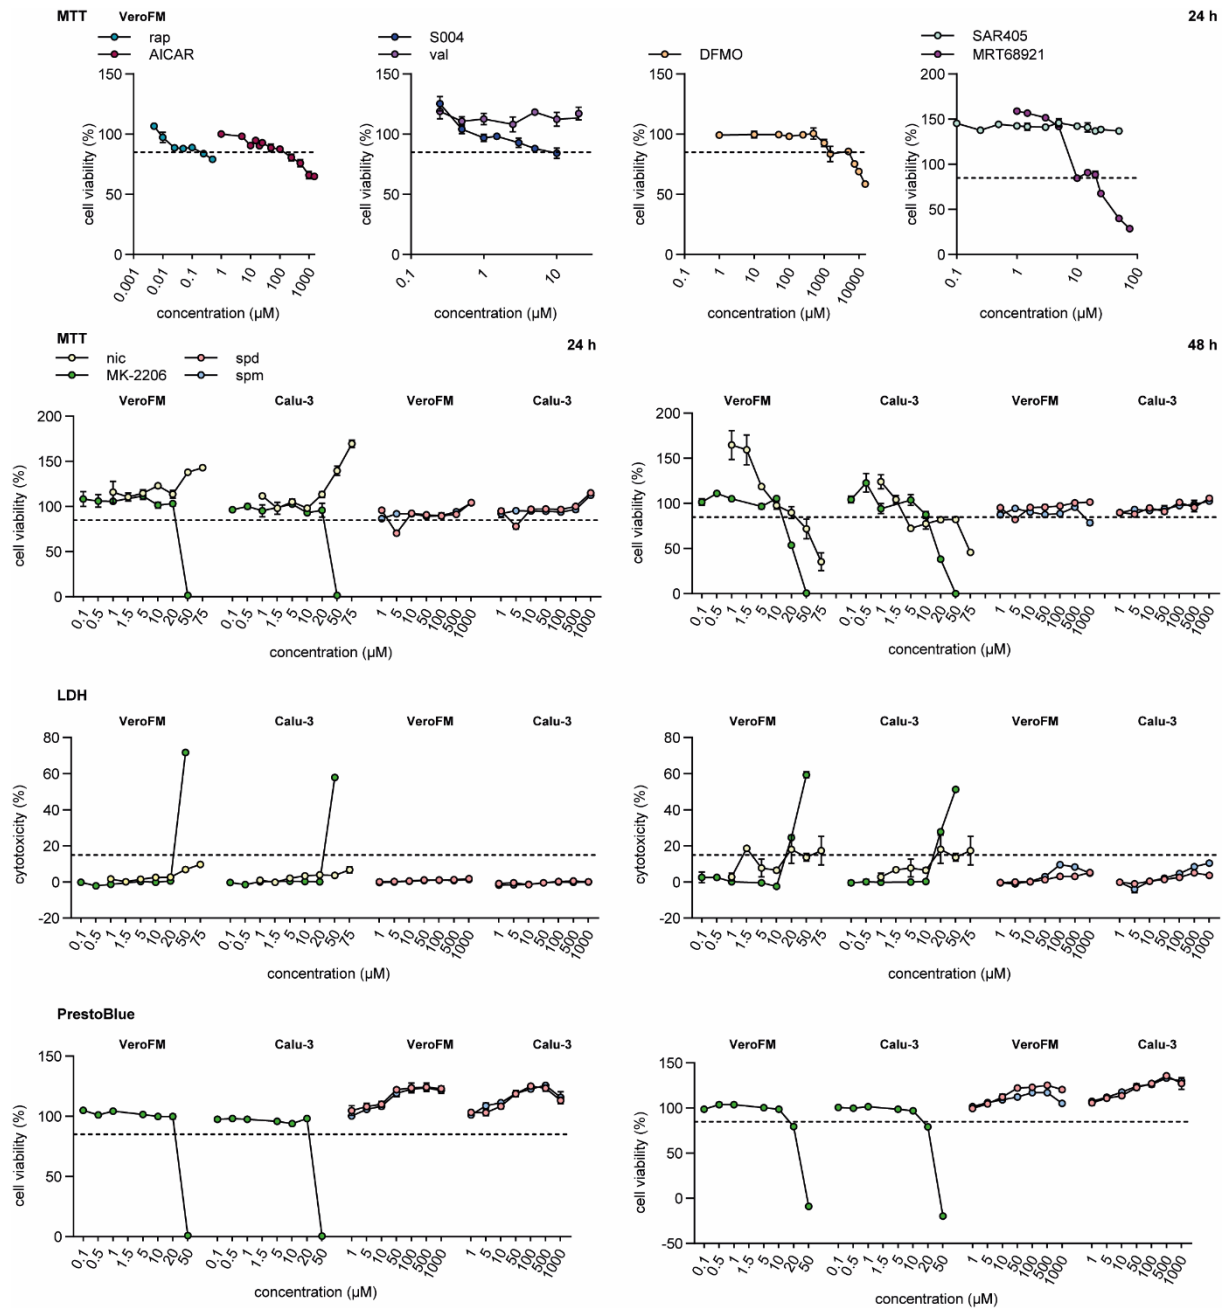

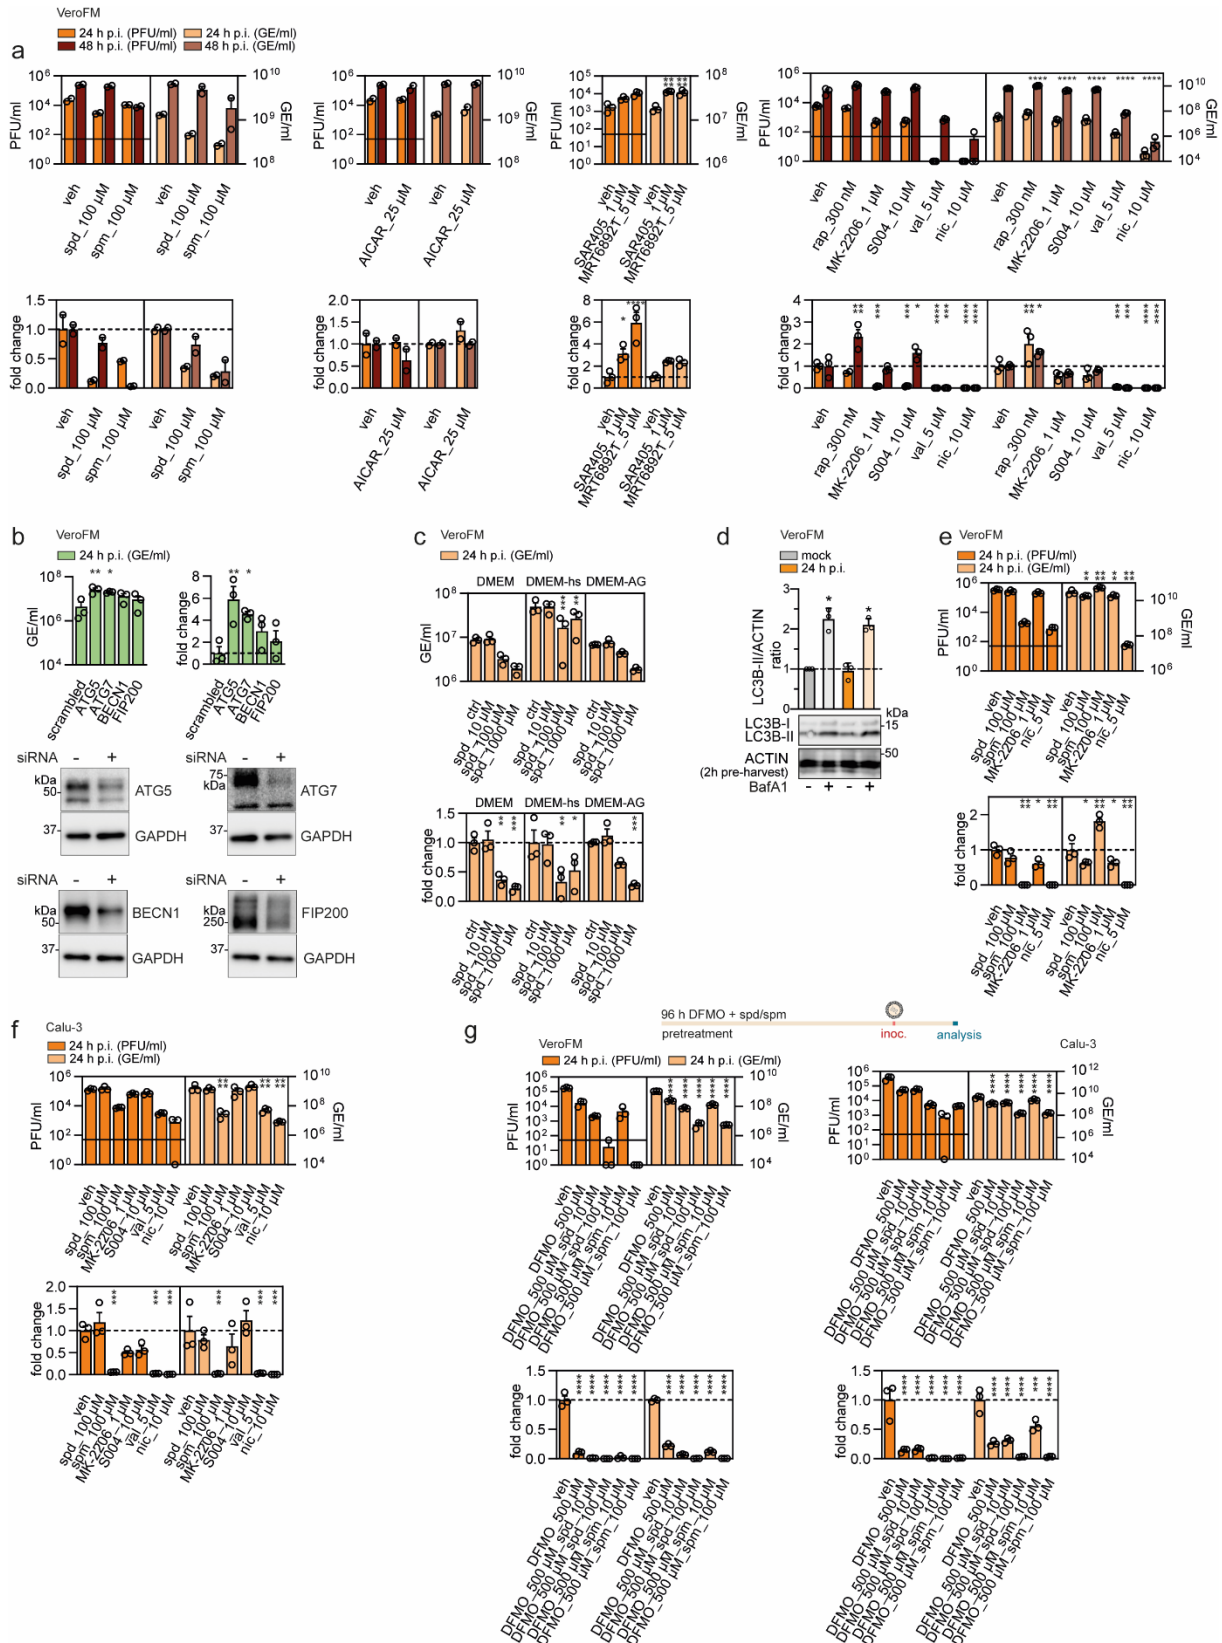

**Supplementary Fig. 11.** **a** Effect of spd, spm, AICAR (all  $n = 2$ ), rap ( $n = 3$ , only 24 h PFU/ml  $n = 2$ ), SAR405, MRT68921, MK-2206, S004, val, and nic (all  $n = 3$ ) on SARS-CoV-2 replication in VerofM cells. **b** Effect of siRNA knockdown of *ATG5*, *ATG7*, *BECN1*, and *FIP200* on SARS-CoV-2 propagation in VerofM cells compared to a non-specific (scrambled) siRNA control ( $n = 3$ ). Knockdown efficiency is shown by Western blot analysis. P-values were determined by one-way ANOVA, Dunnett's, mean with SEM. **c** Effect of growth medium composition on anti-SARS-CoV-2 activity of spd in VerofM cells. DMEM was supplemented with either 10% FBS, 10% human serum (DMEM-hs), or 10% FBS and 1 mM aminoguanidine (DMEM-AG) to exclude unspecific ROS-induced SARS-CoV-2 inhibition. Upper panel GE/ml, lower panel fold-change. **d** Niclosamide-treated (10  $\mu$ M) VerofM cells were infected with SARS-CoV-2 (MOI = 0.0005) and incubated with bafilomycin

A1 (BafA1, 100 nM) or vehicle (DMSO) for 2 h before samples were harvested at 24 h post infection (h p.i.). The ratios of LC3B-II/actin were determined by Western blotting. ( $n = 3$ ). P-values were determined by two-way ANOVA, Sidak post hoc. **e** Effect of 24-hour pre-treatment of spd, spm, MK-2206, and nic on SARS-CoV-2 propagation in VeroFM. **f** Effect of spd, spm, MK-2206, and nic on SARS-CoV-2 propagation in Calu-3 cells post infection, upper panel: PFU/ml, GE/ml, lower panel: fold change. **g** Effect of DFMO-mediated polyamine depletion (96 hours pretreatment) and subsequent DFMO/polyamine co-treatments on SARS-CoV-2 propagation in VeroFM and Calu-3 cells. Limit of detection for PFU/ml=50. **a-g** If not stated otherwise, p-values were determined from  $n = 3$  (one experiment) by two-way ANOVA, Dunnett's, mean with SEM. **Abbreviations:** AICAR, 5-Aminoimidazole-4-carboxamide ribonucleotide; DFMO, difluoromethylornithine; nic, niclosamide; rap, rapamycin; S004, SMIP-004; spd, spermidine; spm, spermine; val, valinomycin.  $p \leq 0.05$  (\*),  $p \leq 0.01$  (\*\*),  $p \leq 0.001$  (\*\*\*),  $p \leq 0.0001$  (\*\*\*\*),  $p > 0.05$  (not significant, ns).

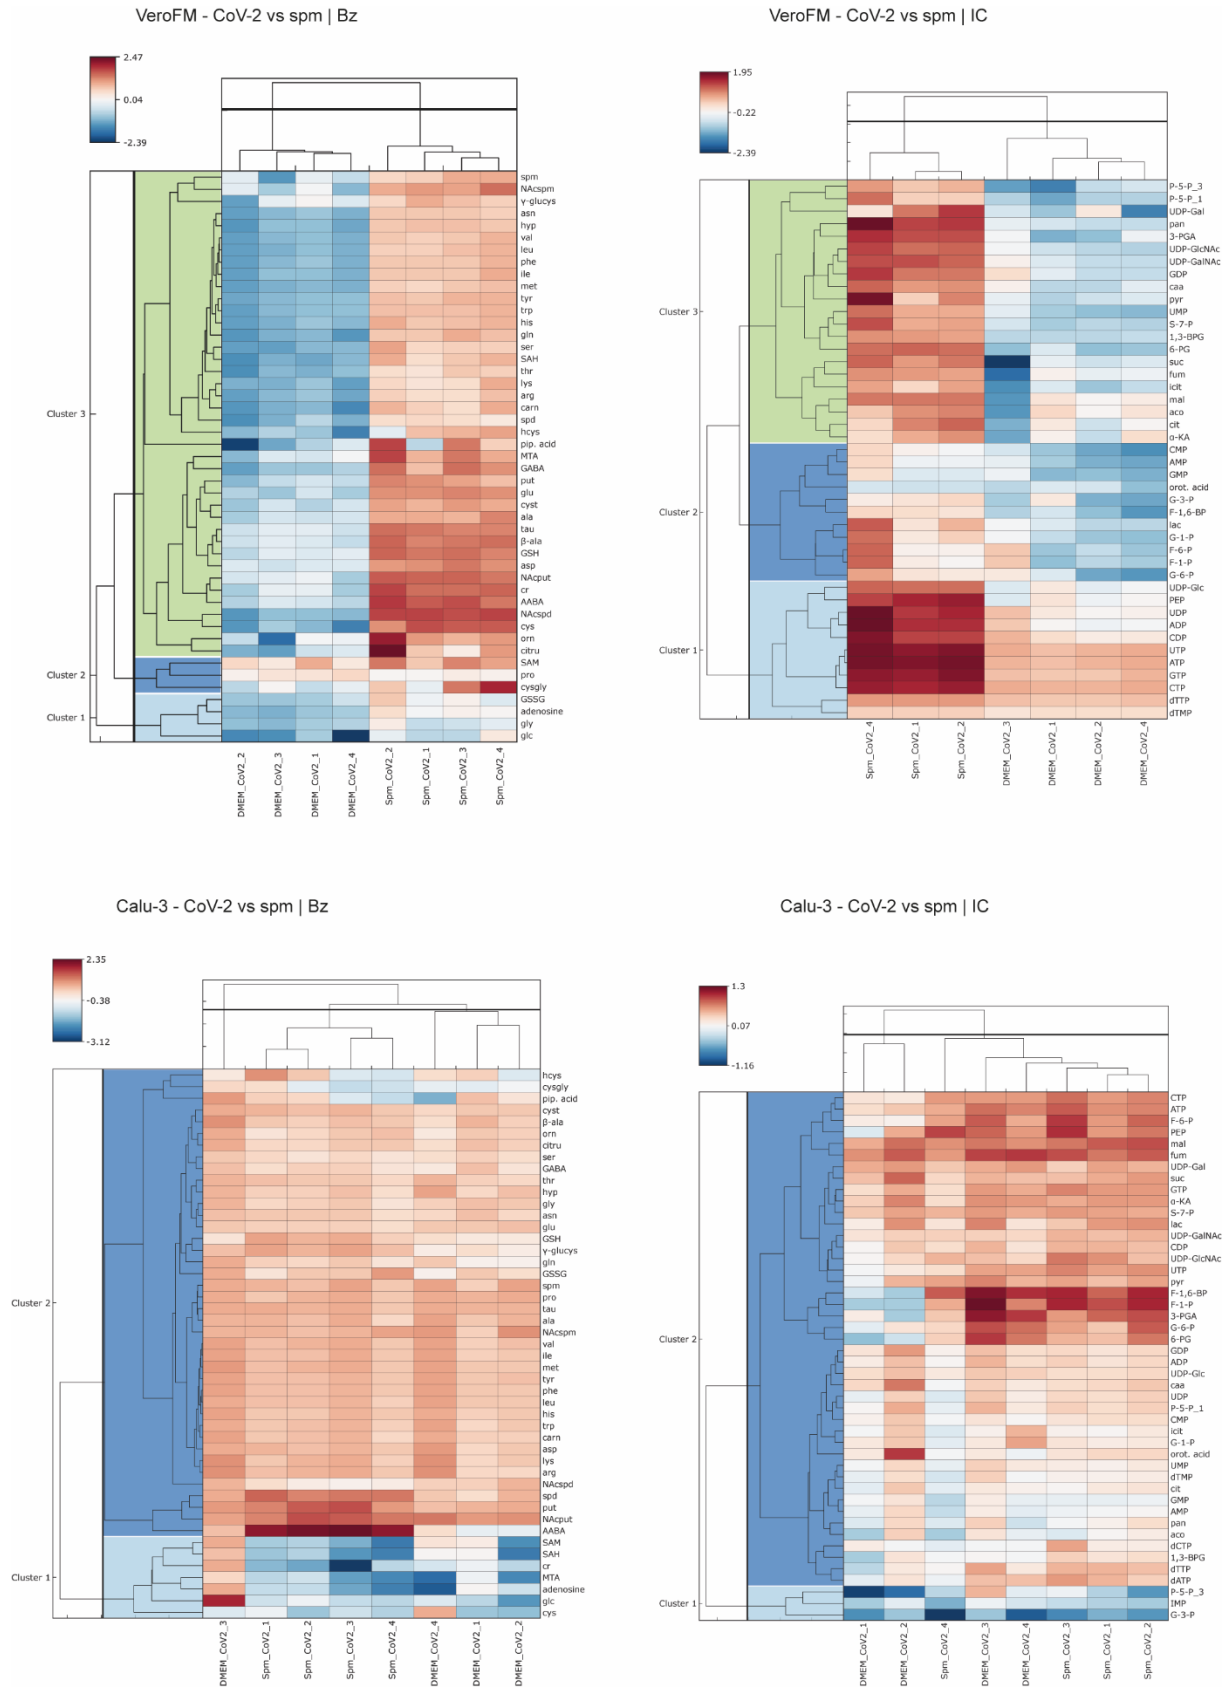

**Supplementary Fig. 12.** Heat maps of amine-containing (Bz) and anionic (IC) metabolites. Data visualizes the log10 transformed and z-score-scaled area values (see source data) of metabolites in VeroFM and Calu-3 cells treated with and without 100  $\mu$ M spm at 24 hours post SARS-CoV-2 infection. A student t test was performed.  $p \leq 0.05$  (\*),  $p \leq 0.01$  (\*\*),  $p \leq 0.001$  (\*\*\*),  $p \leq 0.0001$  (\*\*\*\*),  $p > 0.05$  (not significant, ns). Metabolite abbreviations are summarized in **Supplementary Table 10**.

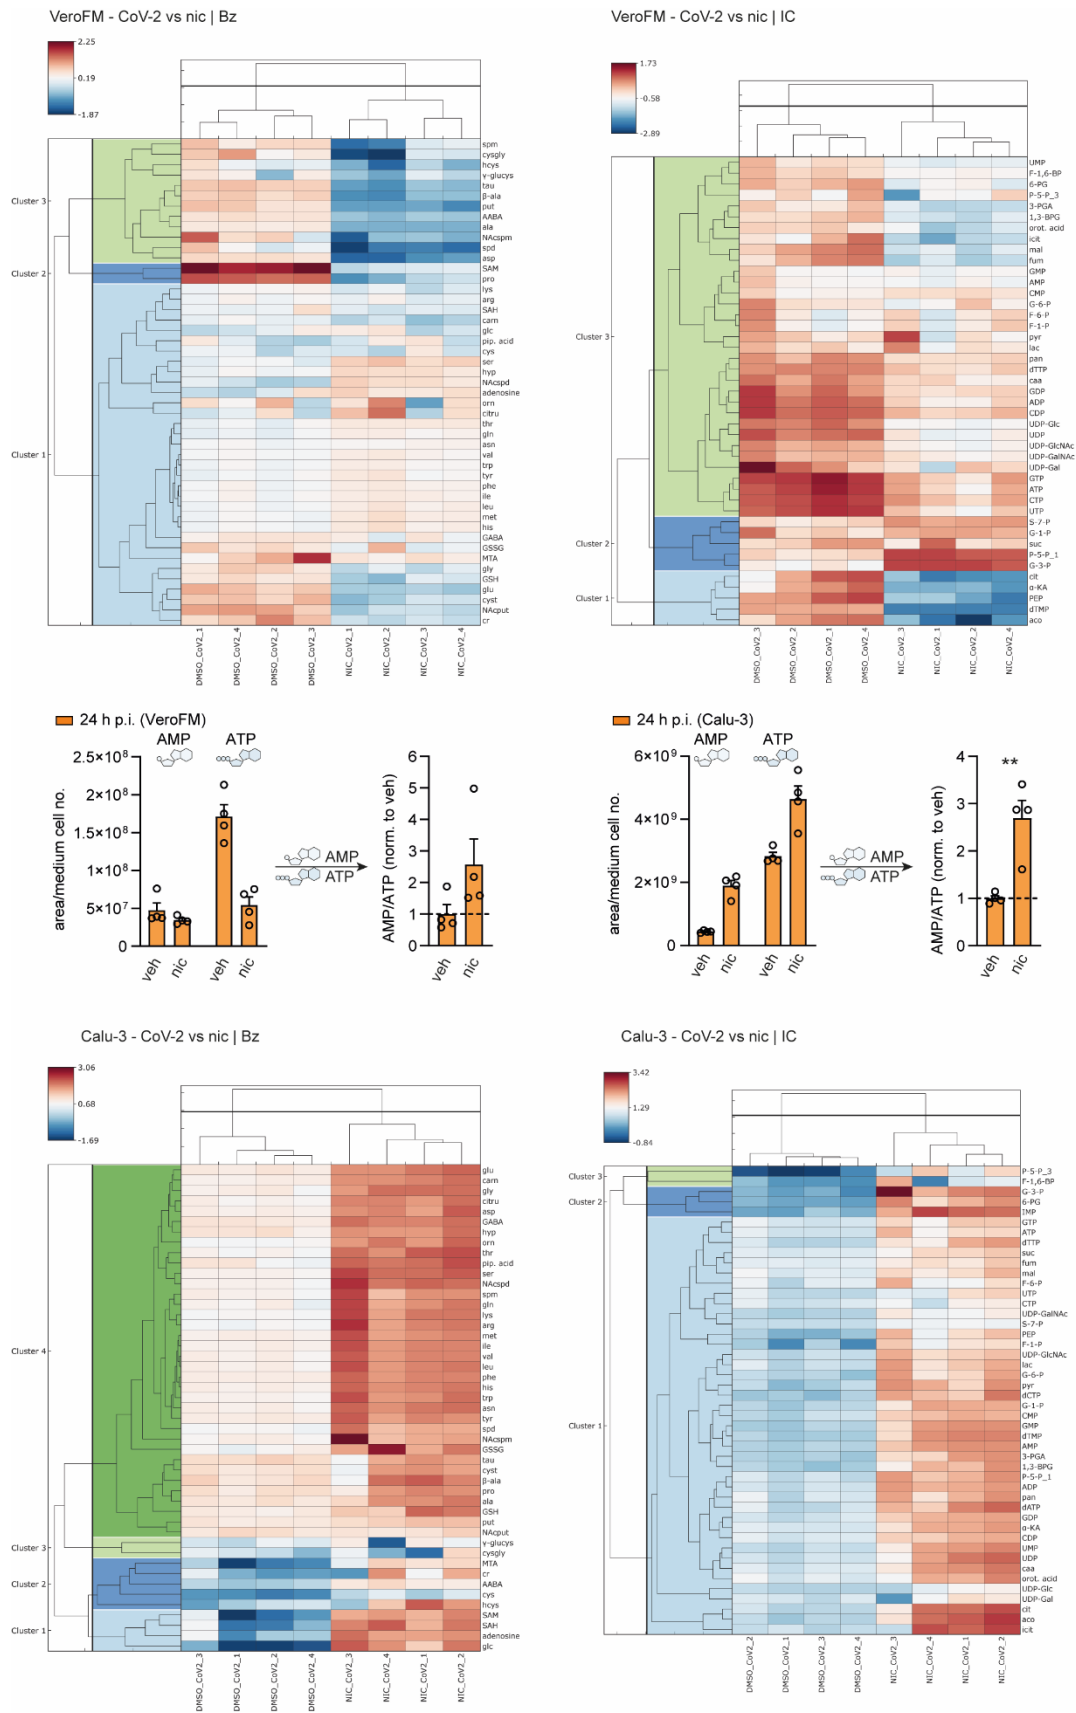

**Supplementary Fig. 13.** Heat maps of amine-containing (Bz) and anionic (IC) metabolites. Data visualizes the log<sub>10</sub> transformed and z-score-scaled area values (see source data) of differentially regulated metabolites in VeroFM and Calu-3 cells treated with and without 10  $\mu$ M NIC at 24 hours post SARS-CoV-2 infection. AMP and ATP raw data and AMP/ATP norm. to vehicle,  $n = 4$ , mean with SEM from one experiment. A Student's *t* test was performed.  $p \leq 0.05$  (\*),  $p \leq 0.01$  (\*\*),  $p \leq 0.001$  (\*\*\*),  $p \leq 0.0001$  (\*\*\*\*),  $p > 0.05$  (not significant, ns). Metabolite abbreviations are summarized in **Supplementary Table 10**.

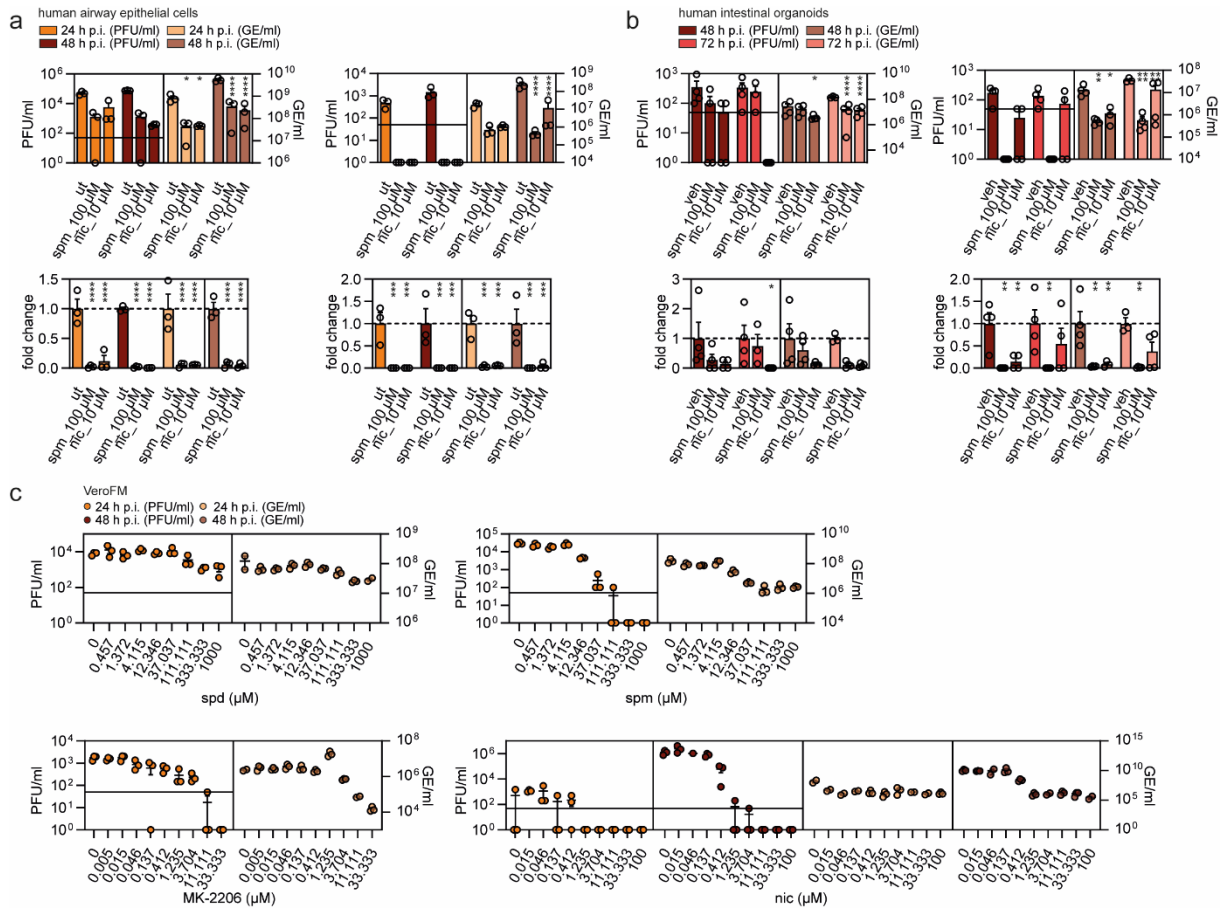

**Supplementary Fig. 14. a-b** The effects of spm and nic on SARS-CoV-2 propagation were examined in human airway epithelial cells at 24 and 48 hours post infection (**a**) and in human intestinal organoids at 48 and 72 hours post infection (**b**).

**a** Two independent experiments (twice,  $n = 3$ , biologically independent samples). P-values were determined by two-way ANOVA, Dunnett's, mean with SEM. **b** Two independent experiments (twice  $n = 4$ , biologically independent samples), except  $n = 3$  in experiment 1 for spm, 72 h p.i. (PFU/ml), veh, 72 h p.i. (GE/ml), and in experiment 2 for spm, 48 h p.i. (GE/ml), veh, 72 h p.i. (GE/ml). For both experiments p-values were determined by two-way ANOVA, Dunnett's, mean with SEM. **c** The putative antiviral effects of spd, spm, MK-2206, and nic were evaluated for dose-dependence (IC50 determination) at 24 (spd, spm, MK-2206) and 48 (nic) hours post SARS-CoV-2 infection. For MK-2206,  $n = 3$  in general,  $n = 2$  for 0 μM and 11.11 μM, 24 h p.i. (GE/ml). For nic,  $n = 3$  in general,  $n = 1$  for 0.046 μM, 48 h p.i. (PFU/ml),  $n = 2$  for 0 μM, 0.015 μM, 0.046 μM, 0.137 μM, 11.11 μM, 33.33 μM, 24 h p.i. (GE/ml),  $n = 2$  for 0.046 μM, 3.704 μM, and 100 μM, 48 h p.i. (GE/ml), mean with SEM.  $p \leq 0.05$  (\*),  $p \leq 0.01$  (\*\*),  $p \leq 0.001$  (\*\*\*),  $p \leq 0.0001$  (\*\*\*\*),  $p > 0.05$  (not significant, ns). **Abbreviations:** nic, niclosamide; spd, spermidine; spm, spermine.

a

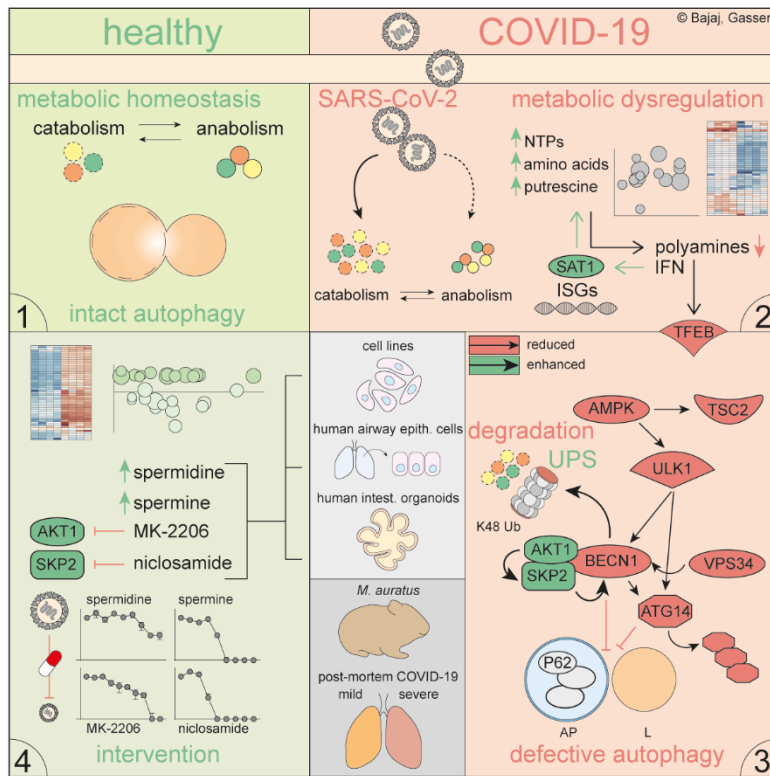

b

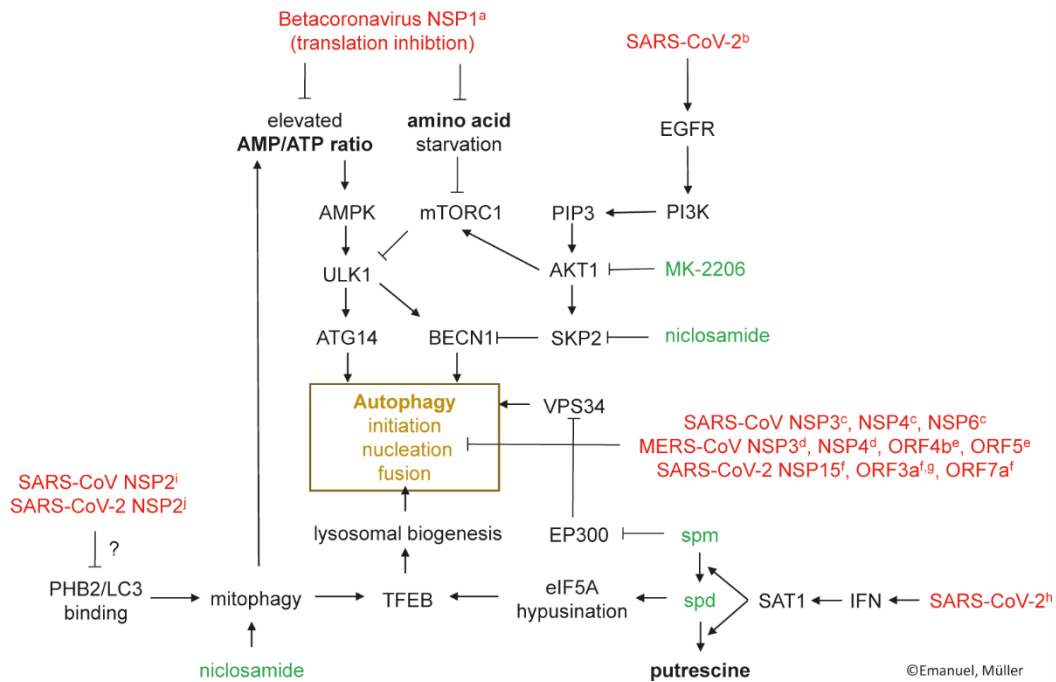

**Supplementary Fig. 15.** Graphical abstract and working model. **a** Graphical abstract summarizing the key findings of the study. **b** Working model including hypothesized interventions of SARS-CoV-2 based on previously published data (references for the red superscript letters a<sup>1-4</sup>; b<sup>5</sup>; c<sup>6</sup>; d<sup>7</sup>; e<sup>8</sup>; f<sup>9</sup>; g<sup>10,11</sup>; h<sup>12</sup>; i<sup>13</sup>; j<sup>14</sup>) and as mentioned in the discussion. Copyrights Thomas Bajaj, Nils C. Gassen (a), Jackson Emanuel, Marcel A. Müller (b).



**Supplementary Table 1. VeroFM metabolomics**

| Metabolite              | SARS-CoV-2-infected     |              |              |              | Mock-infected           |              |              |              | Significance infected vs mock<br><i>p</i> |
|-------------------------|-------------------------|--------------|--------------|--------------|-------------------------|--------------|--------------|--------------|-------------------------------------------|
|                         | area/medium cell number |              |              |              | area/medium cell number |              |              |              |                                           |
|                         | rep1                    | rep2         | rep3         | rep4         | rep1                    | rep2         | rep3         | rep4         |                                           |
| glycine                 | 54015.936               | 50755.126    | 49265.734    | 56250.224    | 25514.503               | 25543.971    | 27336.900    | 29493.889    | <0.001                                    |
| proline                 | 29568740.660            | 24836329.850 | 30196937.490 | 32783021.590 | 8777666.466             | 9310508.168  | 9865928.424  | 9996847.510  | 0.001                                     |
| asparagine              | 1229725.000             | 963400.290   | 1138249.095  | 1058883.362  | 665294.204              | 608088.882   | 542411.475   | 611553.567   | 0.002                                     |
| serine                  | 248277.373              | 209413.633   | 211261.036   | 242006.218   | 159663.299              | 135615.159   | 138172.298   | 133434.758   | 0.003                                     |
| tyrosine                | 46529757.260            | 40606561.170 | 44357330.550 | 46557909.680 | 24469589.990            | 24437590.690 | 28963252.440 | 29043388.460 | 0.003                                     |
| cystathionine           | 3796505.193             | 3395957.275  | 4349019.966  | 4443964.020  | 2254664.933             | 2304116.663  | 1935888.542  | 2330795.539  | 0.003                                     |
| histidine               | 9904582.182             | 7898345.658  | 8732883.997  | 8945573.743  | 5858426.132             | 5325140.481  | 5906758.738  | 6178602.660  | 0.003                                     |
| isoleucine              | 2158680.494             | 1778754.019  | 2121892.334  | 1961899.473  | 1211826.303             | 1209086.958  | 1329807.902  | 1476452.846  | 0.003                                     |
| phenylalanine           | 3389062.089             | 2663183.856  | 3103336.989  | 3053249.384  | 1774319.870             | 1781449.502  | 1922351.260  | 2172022.541  | 0.003                                     |
| glutamic acid           | 49800406.820            | 42681315.270 | 39094217.240 | 40404620.080 | 26108843.090            | 25070719.090 | 29321020.110 | 28913081.680 | 0.003                                     |
| valine                  | 1987813.977             | 1624318.556  | 1894863.681  | 1773790.781  | 1107810.534             | 1043054.124  | 1172519.611  | 1342146.085  | 0.003                                     |
| leucine                 | 2445007.311             | 1948584.693  | 2256546.944  | 2170977.601  | 1395448.575             | 1309207.032  | 1481112.193  | 1649346.315  | 0.004                                     |
| tryptophane             | 5177756.994             | 4225546.393  | 4861490.099  | 4971552.267  | 2676212.639             | 2801510.916  | 2965012.146  | 3541223.250  | 0.004                                     |
| alanine                 | 1287237.788             | 1006030.603  | 1380928.411  | 1336452.566  | 695123.506              | 680769.617   | 660734.874   | 794546.816   | 0.004                                     |
| threonine               | 585900.825              | 482492.609   | 618175.517   | 639326.290   | 340666.217              | 330367.134   | 358296.196   | 392248.304   | 0.004                                     |
| methionine              | 1157779.614             | 945626.635   | 1077716.967  | 1063214.982  | 623901.138              | 614119.407   | 681192.301   | 803381.626   | 0.004                                     |
| glutamine               | 24745893.660            | 19231155.440 | 23693255.930 | 20173448.170 | 13224708.150            | 13005389.210 | 14000271.270 | 16669745.760 | 0.006                                     |
| 4-hydroxyproline        | 545965.805              | 434304.613   | 547071.461   | 464049.099   | 277247.599              | 288678.113   | 316295.817   | 375650.422   | 0.006                                     |
| aspartic acid           | 1322722.000             | 1343433.040  | 1234878.740  | 1328250.612  | 746107.225              | 703925.305   | 874494.228   | 920725.643   | 0.008                                     |
| gamma-aminobutyric acid | 34351.741               | 26925.571    | 34236.394    | 37964.693    | 18655.119               | 20598.669    | 19635.873    | 20419.496    | 0.009                                     |
| N-acetylputrescine      | 1578653.212             | 1257200.492  | 1427573.412  | 921404.453   | 673269.203              | 623073.727   | 830639.625   | 646772.198   | 0.016                                     |
| arginine                | 11460912.530            | 8627996.732  | 10335083.890 | 9295058.444  | 6564461.484             | 6004199.808  | 7313551.447  | 8099132.628  | 0.017                                     |
| lysine                  | 43712009.800            | 36742680.190 | 38226314.290 | 34669646.840 | 24472642.520            | 23431369.170 | 29642458.790 | 31299722.750 | 0.018                                     |
| alpha-aminobutyric acid | 10273307.360            | 7744041.766  | 10599927.140 | 8433369.707  | 5922563.933             | 6851092.110  | 5958511.572  | 6830068.718  | 0.019                                     |
| putrescine              | 83617448.290            | 49815188.640 | 73460346.760 | 71750176.670 | 38968198.740            | 36789573.100 | 37822882.350 | 41530096.640 | 0.023                                     |
| taurine                 | 16370933.310            | 13260434.770 | 15583575.520 | 13426902.580 | 10802540.320            | 11486599.060 | 11469574.110 | 12134095.280 | 0.023                                     |
| beta-alanine            | 6146841.494             | 5290365.776  | 6436089.054  | 5006980.126  | 4212378.285             | 4694466.519  | 4125540.489  | 4787342.177  | 0.029                                     |
| S-adenosylmethionine    | 423471.628              | 307152.537   | 235546.967   | 247455.532   | 132196.411              | 179803.304   | 137255.517   | 219879.138   | 0.029                                     |

|                                    |              |              |              |              |              |              |              |              |                            |
|------------------------------------|--------------|--------------|--------------|--------------|--------------|--------------|--------------|--------------|----------------------------|
| <b>adenosine</b>                   | 171546.442   | 148593.042   | 139123.182   | 182976.454   | 34318.461    | 86217.499    | 30990.739    | 80231.851    | 0.037                      |
| <b>GTP</b>                         | 9464503.124  | 9593431.636  | 10374852.070 | 11036570.850 | 6755498.695  | 6915018.305  | 6876696.692  | 7923845.437  | 0.021                      |
| <b>ATP</b>                         | 80304826.280 | 86086743.780 | 91683955.280 | 97671778.040 | 58817906.310 | 60924818.910 | 57660849.340 | 72008302.180 | 0.027                      |
| <b>dTTP</b>                        | 737720.833   | 808159.855   | 839124.791   | 841528.510   | 662452.405   | 610937.570   | 585139.668   | 661744.893   | 0.027                      |
| <b>1,3-bisphosphoglyceric acid</b> | 6843712.798  | 6572650.522  | 6626495.003  | 7289922.458  | 3634725.624  | 4252337.294  | 3721529.116  | 4984876.388  | 0.027                      |
| <b>CTP</b>                         | 8105046.455  | 8324426.142  | 8677184.628  | 9410438.474  | 5778829.132  | 5796428.869  | 5707661.658  | 7218511.865  | 0.027                      |
| <b>UDP-GalNAc</b>                  | 9377.997     | 27939.311    | 14115.715    | 5029.836     | 4931.339     | 3474.989     | 12871.119    | 6074.039     | 0.027                      |
| <b>UTP</b>                         | 36966556.680 | 39173827.850 | 43423994.910 | 46003711.810 | 29082298.580 | 29328863.600 | 28260072.960 | 34999751.550 | 0.027                      |
| <b>sedoheptulose-7-phosphate</b>   | 388512.905   | 442910.059   | 558541.728   | 432498.087   | 174051.519   | 187255.467   | 211140.607   | 320299.873   | 0.034                      |
|                                    |              |              |              |              |              |              |              |              | significant ( $p < 0.05$ ) |

**Supplementary Table 2. Calu-3 metabolomics**

| Metabolite                | SARS-CoV-2-infected |                |                |                | Mock-infected      |                |                |                | Significance infected vs mock |
|---------------------------|---------------------|----------------|----------------|----------------|--------------------|----------------|----------------|----------------|-------------------------------|
|                           | area/medium number  | cell           |                |                | area/medium number | cell           |                |                |                               |
|                           | rep1                | rep2           | rep3           | rep4           | rep1               | rep2           | rep3           | rep4           | p                             |
| alanine                   | 7095112.389         | 7947875.357    | 7998062.632    | 8882842.299    | 4939173.767        | 5847966.866    | 5831442.859    | 4781432.951    | 0.007                         |
| asparagine                | 5760524.917         | 4774819.653    | 5804383.575    | 4547269.398    | 2058096.960        | 2453889.392    | 2304371.498    | 1708012.506    | 0.002                         |
| aspartic acid             | 1906305.610         | 2198870.885    | 2523197.717    | 2840966.185    | 1175753.600        | 1169475.004    | 1286751.556    | 1135861.400    | 0.010                         |
| carnosine                 | 1812582.506         | 1846997.587    | 2383187.254    | 2351367.038    | 1522989.863        | 1643008.655    | 1733675.291    | 1466753.889    | 0.046                         |
| cystathionine             | 10372625.2.000      | 10425655.0.200 | 11924304.4.800 | 93216215.330   | 78776160.850       | 85544019.730   | 86912786.170   | 82717034.240   | 0.025                         |
| gamma-glutamylcysteine    | 288325.798          | 219075.301     | 408765.062     | 231603.438     | 53430.440          | 63964.717      | 99572.798      | 74513.959      | 0.003                         |
| glutamic acid             | 20208500.2.200      | 22068552.0.500 | 19373076.9.200 | 20302360.6.000 | 15578346.6.900     | 15691194.3.900 | 16687709.3.600 | 14854652.9.400 | 0.003                         |
| glutamine                 | 12853592.6.600      | 12746071.7.400 | 20806594.8.800 | 17717461.7.500 | 69928473.450       | 76986919.490   | 87141131.180   | 62147484.290   | 0.010                         |
| glutathione-reduced (GSH) | 61204399.7.000      | 62234796.1.000 | 64070306.8.700 | 68378194.4.800 | 56209857.7.100     | 56225238.4.400 | 54806760.3.900 | 55665547.3.100 | 0.017                         |
| glycine                   | 704363.007          | 667479.486     | 799679.169     | 597494.845     | 524544.885         | 520150.628     | 555856.347     | 436534.189     | 0.017                         |
| histidine                 | 68900303.790        | 71436238.650   | 94189900.640   | 89651551.030   | 50085364.180       | 47430148.270   | 53793568.960   | 44872709.340   | 0.010                         |
| isoleucine                | 20273494.540        | 21845415.980   | 28479484.480   | 28064842.470   | 14369779.190       | 14942202.990   | 15887922.630   | 13243710.650   | 0.011                         |
| leucine                   | 19642732.640        | 20051804.150   | 25920848.250   | 26218356.160   | 13144491.070       | 13745561.570   | 14713049.960   | 12348482.570   | 0.010                         |
| methionine                | 8289383.717         | 8571288.901    | 11634273.760   | 11377025.430   | 5147484.745        | 5369388.885    | 5814432.136    | 4817653.838    | 0.010                         |
| N-acetylputrescine        | 402748.542          | 479727.155     | 374901.494     | 576718.661     | 101987.753         | 95862.394      | 122490.940     | 87164.863      | 0.001                         |
| N-acetylspermidine        | 5411396.789         | 6705320.581    | 7053960.947    | 5400943.376    | 3800794.877        | 3492423.798    | 3910959.541    | 2806066.233    | 0.007                         |
| N-acetylspermine          | 335127.826          | 735187.700     | 468421.298     | 663254.035     | 256937.902         | 171544.949     | 196319.370     | 148416.588     | 0.011                         |
| phenylalanine             | 25428029.200        | 25876647.320   | 34199473.650   | 33673422.590   | 17592699.030       | 18214695.450   | 19344505.280   | 16784153.220   | 0.011                         |
| proline                   | 33534542.6.900      | 37068784.0.900 | 37388773.0.700 | 36601938.8.100 | 28471366.5.900     | 27026537.0.100 | 25971623.7.400 | 25313800.5.300 | 0.002                         |
| putrescine                | 57343144.890        | 65384611.360   | 78485695.720   | 51109185.180   | 14938951.030       | 13877811.960   | 15561886.290   | 11813645.580   | 0.001                         |
| serine                    | 1101377.008         | 955408.176     | 1134650.388    | 958167.249     | 803235.171         | 755459.174     | 820329.113     | 672119.289     | 0.010                         |
| spermidine                | 49723440.830        | 83957746.340   | 90413903.320   | 68962582.410   | 32153434.710       | 18262496.540   | 23539432.810   | 14438312.540   | 0.007                         |
| spermine                  | 33090684.940        | 56197581.400   | 48130740.050   | 52118600.180   | 20422701.800       | 14809058.990   | 18756810.020   | 14188446.020   | 0.004                         |
| taurine                   | 25416980.540        | 26261989.670   | 28382675.590   | 27537795.330   | 20998098.200       | 22638155.460   | 22914305.260   | 20332471.190   | 0.007                         |
| threonine                 | 4136189.555         | 3879772.924    | 4960696.071    | 5006506.147    | 3132689.140        | 3224526.826    | 3055486.284    | 2693495.115    | 0.010                         |
| tryptophan                | 34527077.920        | 39650844.840   | 49855351.860   | 53089893.460   | 28790012.150       | 29924044.050   | 31058577.420   | 27910660.840   | 0.045                         |
| tyrosine                  | 35002990.1.500      | 38020263.5.100 | 46969338.3.400 | 48308262.0.000 | 25133472.1.400     | 23928876.9.900 | 26125515.3.000 | 23315980.7.400 | 0.011                         |
| valine                    | 13104556.890        | 14790965.850   | 18877641.860   | 18780594.650   | 9591562.953        | 9617156.217    | 10377783.350   | 8522680.385    | 0.011                         |

|                                               |                    |                    |                    |                    |                    |                    |                    |                    |                                    |
|-----------------------------------------------|--------------------|--------------------|--------------------|--------------------|--------------------|--------------------|--------------------|--------------------|------------------------------------|
| <b>GTP</b>                                    | 20039341<br>5.700  | 22861643<br>9.800  | 24379038<br>8.100  | 22888498<br>6.800  | 86906995<br>.090   | 95949493<br>.760   | 93455231<br>.260   | 76168561<br>.250   | <0.001                             |
| <b>CTP</b>                                    | 96996328<br>.420   | 96035205<br>.790   | 12555078<br>1.100  | 12505057<br>0.200  | 24525098<br>.620   | 31613331<br>.090   | 30465756<br>.660   | 25386275<br>.430   | <0.001                             |
| <b>malic acid</b>                             | 16162956<br>68.000 | 19731778<br>63.000 | 19452224<br>44.000 | 17495681<br>80.000 | 83162227<br>2.800  | 10081146<br>46.000 | 81775136<br>9.300  | 83193194<br>2.700  | <0.001                             |
| <b>ATP</b>                                    | 19971229<br>33.000 | 21139139<br>41.000 | 26679385<br>49.000 | 24915484<br>44.000 | 71748837<br>9.800  | 83673829<br>0.300  | 89743745<br>3.400  | 67320238<br>6.700  | <0.001                             |
| <b>UTP</b>                                    | 56768764<br>4.500  | 62160689<br>1.700  | 75055338<br>9.200  | 74286617<br>0.400  | 20594126<br>6.200  | 25071419<br>8.500  | 24586829<br>6.600  | 18497863<br>4.700  | <0.001                             |
| <b>fumaric acid</b>                           | 13753519<br>9.800  | 16965749<br>0.800  | 18262513<br>8.100  | 19620161<br>7.500  | 63627484<br>.730   | 75769227<br>.090   | 79680896<br>.060   | 58803317<br>.590   | 0.001                              |
| <b>GMP</b>                                    | 44022773<br>.070   | 55280215<br>.780   | 49796249<br>.830   | 41435877<br>.150   | 13338048<br>7.500  | 12452650<br>7.800  | 12766075<br>4.700  | 13887953<br>1.800  | 0.001                              |
| <b>glyceric acid<br/>1,3-<br/>biphosphate</b> | 37988026<br>.310   | 49412111<br>.320   | 47012362<br>.590   | 45368439<br>.520   | 20627180<br>.040   | 23847427<br>.180   | 23179263<br>.930   | 25233712<br>.140   | 0.001                              |
| <b>AMP</b>                                    | 23672768<br>2.700  | 33473839<br>9.700  | 28977237<br>2.000  | 23374145<br>4.300  | 67008647<br>9.800  | 65102333<br>2.600  | 62023311<br>7.800  | 77103317<br>7.300  | 0.002                              |
| <b>glucose-1-<br/>phosphate</b>               | 9853200.<br>032    | 12480244<br>.200   | 10005035<br>.230   | 14308815<br>.770   | 24875962<br>.870   | 29995410<br>.460   | 28657643<br>.140   | 31953816<br>.210   | 0.002                              |
| <b>CMP</b>                                    | 19590980<br>.800   | 23812247<br>.020   | 20961396<br>.100   | 18677886<br>.640   | 32369843<br>.800   | 30280942<br>.430   | 31207347<br>.300   | 35240411<br>.540   | 0.003                              |
| <b>dTMP</b>                                   | 3574361.<br>000    | 4502666.<br>563    | 4766748.<br>392    | 3726828.<br>833    | 8044370.<br>458    | 7965694.<br>640    | 8403916.<br>409    | 7961896.<br>699    | 0.006                              |
| <b>dTTP</b>                                   | 9901428.<br>320    | 12201276<br>.320   | 14644664<br>.050   | 12288954<br>.720   | 6554699.<br>485    | 7220923.<br>129    | 7567557.<br>785    | 6185052.<br>283    | 0.006                              |
| <b>UDP-<br/>galactose</b>                     | 1316529.<br>625    | 1450396.<br>129    | 1364678.<br>549    | 1511926.<br>815    | 1060402.<br>939    | 1079606.<br>463    | 1115136.<br>620    | 918183.7<br>60     | 0.006                              |
| <b>phosphoen-<br/>pyruvic<br/>acid</b>        | 22973934<br>.760   | 44095027<br>.340   | 59710902<br>.260   | 48145909<br>.730   | 10822975<br>.650   | 8690143.<br>837    | 15315898<br>.690   | 8580809.<br>459    | 0.007                              |
| <b>dCTP</b>                                   | 931579.8<br>60     | 875701.3<br>44     | 875898.7<br>40     | 872461.4<br>50     | 466095.0<br>98     | 484618.9<br>53     | 578003.7<br>26     | 408609.5<br>56     | 0.007                              |
| <b>CDP</b>                                    | 22775054<br>.990   | 27848023<br>.550   | 29310978<br>.810   | 25676250<br>.810   | 17375364<br>.590   | 19332756<br>.830   | 17394059<br>.470   | 17696443<br>.550   | 0.007                              |
| <b>UDP-N-<br/>acetylgalact-<br/>osamine</b>   | 24031029<br>.800   | 27568717<br>.820   | 28726298<br>.340   | 26528588<br>.780   | 19011261<br>.220   | 21591643<br>.660   | 22239155<br>.840   | 20212590<br>.420   | 0.007                              |
| <b>UMP</b>                                    | 38032669<br>5.600  | 47136394<br>3.800  | 47615530<br>2.700  | 42583800<br>4.300  | 61785503<br>3.700  | 59359955<br>1.800  | 63499651<br>2.100  | 64032354<br>0.500  | 0.010                              |
| <b>fructose 1,6-<br/>bisphosphate</b>         | 12112657<br>2.200  | 10221185<br>0.500  | 36297048<br>8.200  | 31569049<br>3.400  | 24971575<br>.530   | 24136658<br>.090   | 68155591<br>.650   | 15707536<br>.130   | 0.012                              |
| <b>UDP-<br/>glucose</b>                       | 7017249.<br>486    | 8275794.<br>148    | 7869139.<br>169    | 7529624.<br>874    | 6899664.<br>397    | 5935308.<br>892    | 6129666.<br>711    | 5653994.<br>891    | 0.016                              |
| <b>sedoheptulo-<br/>se-7-<br/>phosphate</b>   | 21737975<br>.480   | 27664487<br>.190   | 29033048<br>.080   | 27127584<br>.350   | 19198279<br>.130   | 17202179<br>.340   | 19476854<br>.370   | 18628226<br>.990   | 0.016                              |
| <b>alpha-<br/>ketoglutaric<br/>acid</b>       | 73505169<br>2.900  | 99523612<br>9.700  | 96650125<br>1.700  | 91711261<br>2.700  | 63006254<br>5.000  | 65962100<br>6.900  | 69580962<br>3.900  | 57862548<br>3.500  | 0.017                              |
| <b>dATP</b>                                   | 1096058.<br>980    | 1294664.<br>305    | 1445223.<br>890    | 1441213.<br>302    | 988565.5<br>67     | 954501.9<br>29     | 1156744.<br>541    | 881674.5<br>27     | 0.035                              |
| <b>IMP</b>                                    | 1780866.<br>268    | 2067965.<br>224    | 2207376.<br>978    | 2004470.<br>828    | 2421055.<br>274    | 2253854.<br>381    | 2446194.<br>703    | 2517275.<br>877    | 0.035                              |
| <b>succinic acid</b>                          | 82461571<br>7.000  | 12315355<br>37.000 | 84042186<br>3.000  | 82466433<br>1.200  | 13928528<br>18.000 | 14032886<br>14.000 | 13867480<br>25.000 | 13311614<br>49.000 | 0.043                              |
| <b>fructose-1-<br/>phosphate</b>              | 10490396<br>.460   | 10405260<br>.210   | 29618620<br>.520   | 20054823<br>.950   | 6603416.<br>526    | 5616544.<br>379    | 7826350.<br>388    | 4711544.<br>440    | 0.043                              |
|                                               |                    |                    |                    |                    |                    |                    |                    |                    | significa-<br>nt<br>( $p < 0.05$ ) |

**Supplementary Table 3.** Atom fraction labeling (AFL) data of amine (Bz)- and anion (IC)-containing metabolites of the <sup>13</sup>C isotope enrichment analysis using U-<sup>13</sup>C<sub>6</sub>-labeled glucose as tracer in SARS-CoV-2-infected Calu-3 cells. Metabolite abbreviations are summarized in **Supplementary Table 10**.

| <b>Bz</b> |                                  |                   |                   |                   |                   |                   |                   |                   |                   |                   |                   |                   |                   |               |
|-----------|----------------------------------|-------------------|-------------------|-------------------|-------------------|-------------------|-------------------|-------------------|-------------------|-------------------|-------------------|-------------------|-------------------|---------------|
|           | <b>BIO_SAMPLE_ID</b>             | 115               | 116               | 117               | 118               | 119               | 120               | 109               | 110               | 111               | 112               | 113               | 114               |               |
|           | <b>ORGANISM</b>                  | <i>H. sapiens</i> | <i>H. sapiens</i> | <i>H. sapiens</i> | <i>H. sapiens</i> | <i>H. sapiens</i> | <i>H. sapiens</i> | <i>H. sapiens</i> | <i>H. sapiens</i> | <i>H. sapiens</i> | <i>H. sapiens</i> | <i>H. sapiens</i> | <i>H. sapiens</i> |               |
|           | <b>TISSUE</b>                    | Calu-3            | Calu-3            | Calu-3            | Calu-3            | Calu-3            | Calu-3            | Calu-3            | Calu-3            | Calu-3            | Calu-3            | Calu-3            | Calu-3            | Calu-3        |
|           | <b>TREATMENT</b>                 | mock              | mock              | mock              | mock              | mock              | mock              | CoV-2             | CoV-2             | CoV-2             | CoV-2             | CoV-2             | CoV-2             | mock vs CoV-2 |
|           | <b>TRACE</b>                     | 13C glc           | 13C glc           | 13C glc           | 13C glc           | 13C glc           | 13C glc           | 13C glc           | 13C glc           | 13C glc           | 13C glc           | 13C glc           | 13C glc           | p-values      |
|           | <b>average cell number (xE6)</b> | 1.33              | 1.33              | 1.33              | 1.33              | 1.33              | 1.33              | 1                 | 1                 | 1                 | 1                 | 1                 | 1                 |               |
|           | <b>ala</b>                       | 0.311             | 0.317             | 0.326             | 0.321             | 0.303             | 0.313             | 0.323             | 0.332             | 0.350             | 0.333             | 0.336             | 0.334             | 0.024         |
|           | <b>asn</b>                       | 0.043             | 0.042             | 0.045             | 0.045             | 0.046             | 0.043             | 0.046             | 0.046             | 0.046             | 0.046             | 0.044             | 0.048             | 0.087         |
|           | <b>asp</b>                       | 0.099             | 0.099             | 0.102             | 0.101             | 0.100             | 0.097             | 0.098             | 0.101             | 0.102             | 0.102             | 0.100             | 0.099             | 0.921         |
|           | <b>β-ala</b>                     | 0.034             | 0.033             | 0.033             | 0.033             | 0.034             | 0.034             | 0.033             | 0.033             | 0.033             | 0.034             | 0.034             | 0.033             | 0.921         |
|           | <b>glu</b>                       | 0.113             | 0.113             | 0.107             | 0.107             | 0.112             | 0.107             | 0.108             | 0.113             | 0.106             | 0.113             | 0.112             | 0.108             | 0.921         |
|           | <b>gln</b>                       | 0.028             | 0.028             | 0.027             | 0.030             | 0.027             | 0.030             | 0.028             | 0.030             | 0.024             | 0.027             | 0.027             | 0.025             | 0.650         |
|           | <b>GSH</b>                       | 0.029             | 0.028             | 0.030             | 0.029             | 0.030             | 0.030             | 0.029             | 0.030             | 0.030             | 0.030             | 0.031             | 0.030             | 0.650         |
|           | <b>orn</b>                       | 0.050             | 0.045             | 0.056             | 0.049             | 0.044             | 0.046             | 0.044             | 0.059             | 0.060             | 0.050             | 0.054             | 0.048             | 0.650         |
|           | <b>pro</b>                       | 0.068             | 0.067             | 0.063             | 0.065             | 0.067             | 0.069             | 0.066             | 0.067             | 0.064             | 0.066             | 0.068             | 0.071             | 0.921         |
|           | <b>put</b>                       | 0.048             | 0.048             | 0.048             | 0.048             | 0.048             | 0.048             | 0.048             | 0.048             | 0.048             | 0.048             | 0.048             | 0.047             | 0.921         |
|           | <b>ser</b>                       | 0.047             | 0.049             | 0.046             | 0.047             | 0.043             | 0.049             | 0.047             | 0.045             | 0.046             | 0.049             | 0.048             | 0.047             | 0.921         |
|           | <b>spd</b>                       | 0.045             | 0.045             | 0.045             | 0.045             | 0.044             | 0.044             | 0.045             | 0.043             | 0.042             | 0.045             | 0.046             | 0.047             | 0.921         |
| <b>IC</b> |                                  |                   |                   |                   |                   |                   |                   |                   |                   |                   |                   |                   |                   |               |
|           | <b>BIO_SAMPLE_ID</b>             | 115               | 116               | 117               | 118               | 119               | 120               | 109               | 110               | 111               | 112               | 113               | 114               |               |
|           | <b>ORGANISM</b>                  | <i>H. sapiens</i> | <i>H. sapiens</i> | <i>H. sapiens</i> | <i>H. sapiens</i> | <i>H. sapiens</i> | <i>H. sapiens</i> | <i>H. sapiens</i> | <i>H. sapiens</i> | <i>H. sapiens</i> | <i>H. sapiens</i> | <i>H. sapiens</i> | <i>H. sapiens</i> |               |
|           | <b>TISSUE</b>                    | Calu-3            | Calu-3            | Calu-3            | Calu-3            | Calu-3            | Calu-3            | Calu-3            | Calu-3            | Calu-3            | Calu-3            | Calu-3            | Calu-3            | Calu-3        |
|           | <b>TREATMENT</b>                 | mock              | mock              | mock              | mock              | mock              | mock              | CoV-2             | CoV-2             | CoV-2             | CoV-2             | CoV-2             | CoV-2             | mock vs CoV-2 |
|           | <b>TRACER</b>                    | 13C glc           | 13C glc           | 13C glc           | 13C glc           | 13C glc           | 13C glc           | 13C glc           | 13C glc           | 13C glc           | 13C glc           | 13C glc           | 13C glc           | p-values      |
|           | <b>average cell number (xE6)</b> | 1.33              | 1.33              | 1.33              | 1.33              | 1.33              | 1.33              | 1                 | 1                 | 1                 | 1                 | 1                 | 1                 |               |
|           | <b>BIO_REPLICATE</b>             | 1                 | 2                 | 3                 | 4                 | 5                 | 6                 | 1                 | 2                 | 3                 | 4                 | 5                 | 6                 |               |
|           | <b>1,3-BPG</b>                   | 0.423             | 0.417             | 0.414             | 0.425             | 0.430             | 0.427             | 0.430             | 0.434             | 0.430             | 0.435             | 0.428             | 0.423             | 0.089         |

|                               |       |       |       |       |       |       |       |       |       |       |       |       |        |
|-------------------------------|-------|-------|-------|-------|-------|-------|-------|-------|-------|-------|-------|-------|--------|
| <b>3-PGA</b>                  | 0.419 | 0.417 | 0.418 | 0.420 | 0.417 | 0.421 | 0.426 | 0.428 | 0.426 | 0.429 | 0.430 | 0.428 | <0.001 |
| <b>ADP</b>                    | 0.055 | 0.056 | 0.053 | 0.053 | 0.056 | 0.056 | 0.052 | 0.054 | 0.052 | 0.050 | 0.053 | 0.055 | 0.065  |
| <b><math>\alpha</math>-KG</b> | 0.088 | 0.085 | 0.086 | 0.088 | 0.090 | 0.089 | 0.084 | 0.087 | 0.083 | 0.087 | 0.085 | 0.090 | 0.291  |
| <b>AMP</b>                    | 0.041 | 0.042 | 0.038 | 0.040 | 0.042 | 0.041 | 0.039 | 0.042 | 0.038 | 0.039 | 0.040 | 0.041 | 0.514  |
| <b>ATP</b>                    | 0.045 | 0.046 | 0.044 | 0.046 | 0.048 | 0.045 | 0.046 | 0.047 | 0.043 | 0.045 | 0.048 | 0.045 | 0.870  |
| <b>cit</b>                    | 0.147 | 0.145 | 0.146 | 0.145 | 0.147 | 0.142 | 0.144 | 0.148 | 0.141 | 0.146 | 0.145 | 0.149 | 0.886  |
| <b>F-1-P</b>                  | 0.425 | 0.429 | 0.449 | 0.440 | 0.444 | 0.431 | 0.442 | 0.446 | 0.445 | 0.441 | 0.458 | 0.441 | <0.001 |
| <b>F-1,6-BP</b>               | 0.433 | 0.431 | 0.434 | 0.434 | 0.436 | 0.434 | 0.442 | 0.444 | 0.443 | 0.443 | 0.444 | 0.445 | 0.156  |
| <b>F-6-P</b>                  | 0.421 | 0.439 | 0.425 | 0.414 | 0.424 | 0.440 | 0.434 | 0.429 | 0.438 | 0.434 | 0.442 | 0.425 | 0.291  |
| <b>fum</b>                    | 0.110 | 0.112 | 0.113 | 0.112 | 0.117 | 0.108 | 0.107 | 0.109 | 0.101 | 0.107 | 0.105 | 0.118 | 0.223  |
| <b>IMP</b>                    | 0.074 | 0.077 | 0.076 | 0.073 | 0.078 | 0.078 | 0.072 | 0.073 | 0.070 | 0.069 | 0.068 | 0.077 | 0.058  |
| <b>icit</b>                   | 0.251 | 0.243 | 0.239 | 0.258 | 0.227 | 0.216 | 0.212 | 0.215 | 0.227 | 0.224 | 0.250 | 0.270 | 0.689  |
| <b>lac</b>                    | 0.408 | 0.355 | 0.428 | 0.396 | 0.341 | 0.371 | 0.337 | 0.436 | 0.437 | 0.411 | 0.424 | 0.358 | 0.588  |
| <b>mal</b>                    | 0.095 | 0.093 | 0.095 | 0.091 | 0.096 | 0.092 | 0.090 | 0.092 | 0.088 | 0.093 | 0.092 | 0.095 | 0.269  |
| <b>PEP</b>                    | 0.427 | 0.418 | 0.420 | 0.416 | 0.429 | 0.000 | 0.428 | 0.426 | 0.420 | 0.422 | 0.419 | 0.379 | 0.475  |
| <b>pyr</b>                    | 0.369 | 0.340 | 0.376 | 0.316 | 0.335 | 0.342 | 0.329 | 0.368 | 0.375 | 0.355 | 0.347 | 0.292 | 0.886  |
| <b>S-7-P</b>                  | 0.268 | 0.285 | 0.270 | 0.279 | 0.293 | 0.286 | 0.287 | 0.295 | 0.290 | 0.295 | 0.303 | 0.297 | 0.056  |
| <b>suc</b>                    | 0.088 | 0.087 | 0.086 | 0.083 | 0.085 | 0.082 | 0.078 | 0.083 | 0.079 | 0.075 | 0.082 | 0.074 | 0.023  |
| <b>UDP</b>                    | 0.185 | 0.185 | 0.180 | 0.180 | 0.182 | 0.187 | 0.167 | 0.165 | 0.162 | 0.162 | 0.167 | 0.170 | <0.001 |
| <b>UMP</b>                    | 0.122 | 0.121 | 0.116 | 0.117 | 0.124 | 0.124 | 0.108 | 0.107 | 0.103 | 0.102 | 0.109 | 0.109 | <0.001 |
| <b>UTP</b>                    | 0.144 | 0.145 | 0.139 | 0.140 | 0.142 | 0.146 | 0.131 | 0.132 | 0.124 | 0.123 | 0.129 | 0.133 | 0.001  |

**Supplementary Table 4.** Isotope incorporation ratios (CoV-2/mock for enriched fraction) for amine (Bz)- and anion (IC)-containing metabolites in SARS-CoV-2-infected Calu-3 cells. Metabolite abbreviations are summarized in **Supplementary Table 10**.

| ORGANISM          | TISSUE | TREATMENT | COMPOUND_ID | Compound/<br>Pathway | Analysis | n | mean (% <sup>13</sup> C<br>labeling) | sd      | ratio<br>(CoV-<br>2/mock) | FDR corrected p-<br>value |
|-------------------|--------|-----------|-------------|----------------------|----------|---|--------------------------------------|---------|---------------------------|---------------------------|
| <i>H. sapiens</i> | Calu-3 | CoV-2     | ala         | amino acids          | Bz       | 6 | 0.33                                 | 0.00855 | 1.03                      | 2.42E-02                  |
| <i>H. sapiens</i> | Calu-3 | CoV-2     | asn         | amino acids          | Bz       | 6 | 0.05                                 | 0.0013  | 1.25                      | 8.69E-02                  |
| <i>H. sapiens</i> | Calu-3 | CoV-2     | asp         | amino acids          | Bz       | 6 | 0.1                                  | 0.00171 | 1                         | 9.21E-01                  |
| <i>H. sapiens</i> | Calu-3 | CoV-2     | β-ala       | amino acids          | Bz       | 6 | 0.03                                 | 0.00028 | 1                         | 9.21E-01                  |
| <i>H. sapiens</i> | Calu-3 | CoV-2     | glu         | amino acids          | Bz       | 6 | 0.11                                 | 0.00303 | 1                         | 9.21E-01                  |
| <i>H. sapiens</i> | Calu-3 | CoV-2     | gln         | amino acids          | Bz       | 6 | 0.03                                 | 0.00213 | 1                         | 6.50E-01                  |
| <i>H. sapiens</i> | Calu-3 | CoV-2     | GSH         | amino acids          | Bz       | 6 | 0.03                                 | 0.00064 | 1                         | 6.50E-01                  |
| <i>H. sapiens</i> | Calu-3 | CoV-2     | orn         | amino acids          | Bz       | 6 | 0.05                                 | 0.00641 | 1                         | 6.50E-01                  |
| <i>H. sapiens</i> | Calu-3 | CoV-2     | pro         | amino acids          | Bz       | 6 | 0.07                                 | 0.00242 | 1                         | 9.21E-01                  |
| <i>H. sapiens</i> | Calu-3 | CoV-2     | put         | amino acids          | Bz       | 6 | 0.05                                 | 0.00047 | 1                         | 9.21E-01                  |
| <i>H. sapiens</i> | Calu-3 | CoV-2     | ser         | amino acids          | Bz       | 6 | 0.05                                 | 0.00148 | 1                         | 9.21E-01                  |
| <i>H. sapiens</i> | Calu-3 | CoV-2     | spm         | amino acids          | Bz       | 6 | 0.04                                 | 0.00151 | 1                         | 9.21E-01                  |
| <i>H. sapiens</i> | Calu-3 | CoV-2     | F-6-P       | glycolysis           | IC       | 6 | 0.43                                 | 0.0061  | 1.02                      | 2.25E-02                  |
| <i>H. sapiens</i> | Calu-3 | CoV-2     | F-1-P       | glycolysis           | IC       | 6 | 0.45                                 | 0.00646 | 1.02                      | 8.86E-01                  |
| <i>H. sapiens</i> | Calu-3 | CoV-2     | 1,6-FBP     | glycolysis           | IC       | 6 | 0.44                                 | 0.00077 | 1.02                      | 2.69E-01                  |

|                   |        |       |              |             |    |   |      |         |      |          |
|-------------------|--------|-------|--------------|-------------|----|---|------|---------|------|----------|
| <i>H. sapiens</i> | Calu-3 | CoV-2 | 1,3-BPG      | glycolysis  | IC | 6 | 0.43 | 0.00412 | 1.02 | 8.92E-02 |
| <i>H. sapiens</i> | Calu-3 | CoV-2 | 3-PGA        | glycolysis  | IC | 6 | 0.43 | 0.00169 | 1.02 | 6.55E-02 |
| <i>H. sapiens</i> | Calu-3 | CoV-2 | PEP          | glycolysis  | IC | 6 | 0.42 | 0.01812 | 1.18 | 2.91E-01 |
| <i>H. sapiens</i> | Calu-3 | CoV-2 | pyr          | glycolysis  | IC | 6 | 0.34 | 0.0302  | 0.99 | 5.85E-02 |
| <i>H. sapiens</i> | Calu-3 | CoV-2 | lac          | glycolysis  | IC | 6 | 0.4  | 0.04249 | 1.05 | 8.70E-01 |
| <i>H. sapiens</i> | Calu-3 | CoV-2 | cit          | TCA         | IC | 6 | 0.15 | 0.00262 | 1    | 6.89E-01 |
| <i>H. sapiens</i> | Calu-3 | CoV-2 | icit         | TCA         | IC | 6 | 0.23 | 0.02222 | 0.98 | 2.91E-01 |
| <i>H. sapiens</i> | Calu-3 | CoV-2 | suc          | TCA         | IC | 6 | 0.08 | 0.00372 | 0.92 | ND       |
| <i>H. sapiens</i> | Calu-3 | CoV-2 | $\alpha$ -KG | TCA         | IC | 6 | 0.09 | 0.00242 | 0.98 | 8.86E-01 |
| <i>H. sapiens</i> | Calu-3 | CoV-2 | fum          | TCA         | IC | 6 | 0.11 | 0.00538 | 0.96 | 1.12E-04 |
| <i>H. sapiens</i> | Calu-3 | CoV-2 | mal          | TCA         | IC | 6 | 0.09 | 0.00222 | 0.98 | 2.10E-05 |
| <i>H. sapiens</i> | Calu-3 | CoV-2 | IMP          | nucleotides | IC | 6 | 0.07 | 0.00326 | 0.94 | 2.10E-05 |
| <i>H. sapiens</i> | Calu-3 | CoV-2 | AMP          | nucleotides | IC | 6 | 0.04 | 0.00124 | 0.98 | 1.56E-01 |
| <i>H. sapiens</i> | Calu-3 | CoV-2 | ADP          | nucleotides | IC | 6 | 0.05 | 0.00175 | 0.96 | 5.14E-01 |
| <i>H. sapiens</i> | Calu-3 | CoV-2 | ATP          | nucleotides | IC | 6 | 0.05 | 0.00157 | 1.01 | 2.23E-01 |
| <i>H. sapiens</i> | Calu-3 | CoV-2 | UMP          | nucleotides | IC | 6 | 0.11 | 0.00304 | 0.88 | 2.49E-05 |
| <i>H. sapiens</i> | Calu-3 | CoV-2 | UDP          | nucleotides | IC | 6 | 0.17 | 0.00334 | 0.9  | 5.55E-02 |
| <i>H. sapiens</i> | Calu-3 | CoV-2 | UTP          | nucleotides | IC | 6 | 0.13 | 0.00433 | 0.9  | 7.66E-04 |
| <i>H. sapiens</i> | Calu-3 | CoV-2 | S-7-P        | nucleotides | IC | 6 | 0.29 | 0.0056  | 1.05 | 5.88E-01 |



**Supplementary Table 5. Data of COVID-19 deceased individuals and control patients for IHC**

| Patient ID | Gender | Age | SARS-CoV-2 | Cause of death and ventilation                                                                              | Disease Duration (days) | Deceased (category) | lung max viral load (log <sub>10</sub> /10.000 cells) |
|------------|--------|-----|------------|-------------------------------------------------------------------------------------------------------------|-------------------------|---------------------|-------------------------------------------------------|
| PA-1       | M      | 77  | positive   | septic shock, no ventilation, no ECMO                                                                       | 14                      | early               | 6.73                                                  |
| PA-2       | M      | 81  | positive   | sepsis, no ECMO                                                                                             | 11                      | early               | 6.93                                                  |
| PA-3       | M      | 62  | positive   | 13d ICU, no ECMO, ARDS, septic shock                                                                        | 19                      | late                | 3.81                                                  |
| PA-4       | F      | 56  | positive   | ventilation, ECMO, septic shock, ARDS                                                                       | 27                      | late                | 2.46                                                  |
| PA-5       | M      | 63  | positive   | early onset Alzheimer, ventilation 2 days                                                                   | 28                      | late                | 2.18                                                  |
| PA-6       | M      | 89  | positive   | ARDS, pneumonia, no ECMO                                                                                    | 14                      | early               | 5.54                                                  |
| CO-1       | M      | 67  | NA         | MOF cardiac, COPD, ECMO                                                                                     | NA                      | NA                  | NA                                                    |
| CO-2       | F      | 77  | NA         | intracerebral bleeding; amyloid angiopathy                                                                  | NA                      | NA                  | NA                                                    |
| CO-3       | M      | 77  | NA         | ALS; chronic hypoventilation                                                                                | NA                      | NA                  | NA                                                    |
| PN-1       | M      | 59  | NA         | Pulmonary artery embolism, aspiration pneumonia, dysphagia, cerebral and spinal metastases, unknown primary | NA                      | NA                  | NA                                                    |
| PN-2       | F      | 94  | NA         | aspiration pneumonia, lobar pneumonia, dementia                                                             | NA                      | NA                  | NA                                                    |
| PN-3       | M      | 56  | NA         | septic MOF; pneumonia, polycystic kidney syndrome                                                           | NA                      | NA                  | NA                                                    |

Abbreviations: n.a., not applicable; PA, patient/COVID-19; CO, control; PN, patient/pneumonia; ECMO, extracorporeal membrane oxygenation; ICU, intensive care unit; ARDS, acute respiratory distress syndrome; COPD, chronic obstructive pulmonary disease; MOF, multi organ failure; ALS, amyotrophic lateral sclerosis.

**Supplementary Table 6. Immunohistochemistry for P62 and LC3 protein in lung samples**

| Patient ID                         | Immunohistochemistry counts (4 random fields at 40x) |           |           |           |          |          |
|------------------------------------|------------------------------------------------------|-----------|-----------|-----------|----------|----------|
|                                    | P62 exp 1                                            | LC3 exp 1 | P62 exp 2 | LC3 exp 2 | P62 mean | LC3 mean |
| PA-1                               | 72                                                   | 16        | 69        | 11        | 70.5     | 13.5     |
| PA-2                               | 98                                                   | 20        | 92        | 16        | 95.0     | 18.0     |
| PA-3                               | 150                                                  | 8         | 140       | 10        | 145.0    | 9.0      |
| PA-4                               | 80                                                   | 38        | 86        | 32        | 83.0     | 35.0     |
| PA-5                               | 85                                                   | 4         | 90        | 7         | 87.5     | 5.5      |
| PA-6                               | 105                                                  | 10        | 119       | 8         | 112.0    | 9.0      |
| CO-1                               | 49                                                   | 11        | 59        | 10        | 54.0     | 10.5     |
| CO-2                               | 30                                                   | 9         | 38        | 12        | 34.0     | 10.5     |
| CO-3                               | 17                                                   | 9         | 25        | 12        | 21.0     | 10.5     |
| PN-1                               | 8                                                    | 12        | 17        | 13        | 12.5     | 12.5     |
| PN-2                               | 86                                                   | 10        | 82        | 8         | 84.0     | 9.0      |
| PN-3                               | 40                                                   | 3         | 46        | 4         | 43.0     | 3.5      |
| <b>mean patient/COVID-19 (PA)</b>  |                                                      |           |           |           | 98.8     | 15.0     |
| <b>mean control (CO)</b>           |                                                      |           |           |           | 36.3     | 10.5     |
| <b>mean patient/pneumonia (PN)</b> |                                                      |           |           |           | 46.5     | 8.3      |

Abbreviations: n.a., not applicable; PA, patient/COVID-19; CO, control; PN, patient/pneumonia; ECMO, extracorporeal membrane oxygenation; ICU, intensive care unit; ARDS, acute respiratory distress syndrome; COPD, chronic obstructive pulmonary disease; MOF, multi organ failure; ALS, amyotrophic lateral sclerosis.

**Supplementary Table 7. COVID-19 patient and control lung samples analyzed by sNuc-Seq analysis**

| Patient ID | Gender | Age | SARS-CoV-2 | Cause of death and ventilation                                  | Disease Duration (days) | Deceased (category) | Viral load (log <sub>10</sub> /10,000 cells) | N cells | Median genes per cell | Total genes detected | Mean reads per cell | Number of reads |
|------------|--------|-----|------------|-----------------------------------------------------------------|-------------------------|---------------------|----------------------------------------------|---------|-----------------------|----------------------|---------------------|-----------------|
| PA-1       | M      | 76  | positive   | septic shock, no ventilation, no ECMO                           | 14                      | early               | 6.73                                         | 6,412   | 809                   | 25,849               | 58,685              | 376,288,240     |
| PA-2       | M      | 81  | positive   | sepsis, no ECMO                                                 | 11                      | early               | 6.93                                         | 3,223   | 1,219                 | 25,372               | 97,766              | 315,100,806     |
| PA-6       | M      | 89  | positive   | ARDS, pneumonia, no ECMO                                        | 14                      | early               | 5.54                                         | 5,915   | 1,591                 | 26,834               | 33,702              | 199,351,673     |
| PA-7       | M      | 68  | positive   | ARDS, acute basal ganglia infarct, ECMO                         | 34                      | late                | 1.7                                          | 3,506   | 801                   | 24,547               | 66,716              | 233,907,986     |
| PA-8       | M      | 72  | positive   | ARDS, ventilation and ECMO                                      | 79                      | late                | 2.61                                         | 11,582  | 1,922                 | 27,833               | 33,245              | 385,050,204     |
| PA-9       | M      | 77  | positive   | acute liver + renal failure, sepsis, gastric bleeding           | 84                      | late                | neg                                          | 4,727   | 928                   | 24,756               | 78,453              | 370,851,021     |
| PA-10      | F      | 68  | positive   | pulmonary superinfection, septic shock, ventilation and ECMO    | 34                      | late                | 1.2                                          | 1,896   | 868                   | 23,061               | 118,572             | 224,812,951     |
| CO-4       | M      | 67  | NA         | MOF, cardiac, COPD, ECMO                                        | NA                      | control             | NA                                           | 6,724   | 1,904                 | 27,971               | 31,182              | 209,668,599     |
| CO-5       | F      | 54  | NA         | aspiration pneumonia, no ventilation                            | NA                      | control             | NA                                           | 2,840   | 903                   | 24,369               | 178,957             | 508,240,202     |
| CO-6       | F      | 94  | NA         | aspiration pneumonia, lobar pneumonia, dementia, no ventilation | NA                      | control             | NA                                           | 4,776   | 1,302                 | 26,807               | 157,382             | 751,660,192     |

Abbreviations: n.a., not applicable; PA, patient/COVID-19; CO, control; PN, patient/pneumonia; M, male; F, female; ECMO, extracorporeal membrane oxygenation; ARDS, acute respiratory distress syndrome; COPD, chronic obstructive pulmonary disease; MOF, multi organ failure; ALS, amyotrophic lateral sclerosis.

**Supplementary Table 8. COVID-19 patients and controls for scSeq analysis of olfactory mucosal samples**

| Patient ID | Gender | Age | SARS-CoV-2 | Clinical outcome | Viral Load | Conc. LOG <sub>10</sub> SARS-CoV-2 RNA swab per ml | Days symptom onset/ PCR test | Days symptom onset/ scSeq |
|------------|--------|-----|------------|------------------|------------|----------------------------------------------------|------------------------------|---------------------------|
| PA-11      | M      | 73  | positive   | critical         | high       | 5.45                                               | 12                           | 13                        |
| PA-12      | M      | 61  | positive   | critical         | high       | 5.52                                               | 10                           | 11                        |
| PA-13      | M      | 52  | positive   | critical         | high       | 7.69                                               | 9                            | 10                        |
| PA-14      | M      | 75  | positive   | critical         | low        | 4.86                                               | 7                            | 7                         |
| PA-15      | M      | 54  | positive   | critical         | low        | 4.39                                               | 7                            | 7                         |
| PA-16      | M      | 32  | positive   | critical         | low        | 3.49                                               | 8                            | 8                         |
| PA-17      | M      | 32  | positive   | critical         | low        | 3.18                                               | 10                           | 11                        |
| PA-18      | M      | 45  | positive   | moderate         | low        | 4.40                                               | 11                           | 11                        |
| CO-7       | F      | 34  | NA         | NA               | control    | NA                                                 | NA                           | NA                        |
| CO-8       | F      | 41  | NA         | NA               | control    | NA                                                 | NA                           | NA                        |
| CO-9       | M      | 24  | NA         | NA               | control    | NA                                                 | NA                           | NA                        |
| CO-10      | M      | 33  | NA         | NA               | control    | NA                                                 | NA                           | NA                        |
| CO-11      | F      | 36  | NA         | NA               | control    | NA                                                 | NA                           | NA                        |

Abbreviations: n.a., not applicable; PA, patient/COVID-19; CO, control; M, male; F, female

**Supplementary Table 9. Overview of compounds**

| Compound       | Concentration Used      | Reasoning                                                                                                                                                    |
|----------------|-------------------------|--------------------------------------------------------------------------------------------------------------------------------------------------------------|
| AICAR          | 25 $\mu$ M              | AMPK activation corresponds linearly to AICAR concentration up to 500 $\mu$ M in isolated hepatocytes <sup>15</sup> .                                        |
| bafilomycin A1 | 100 nM                  | 100 nM of BafA1 is sufficient to induce maximal LC3B lipidation levels in both cell cultures ( <b>Supplementary Fig. 7</b> ).                                |
| DFMO           | 0.5 mM                  | 0.5 mM is sufficient to inhibit ornithine decarboxylase <sup>16</sup> .                                                                                      |
| MK-2206        | 1 $\mu$ M               | 0.5 $\mu$ M is sufficient to inhibit AKT <sup>17</sup> .                                                                                                     |
| MRT68921       | 5 $\mu$ M               | 1 $\mu$ M is sufficient to potently inhibit ULK1 and ULK2 <sup>18</sup> .                                                                                    |
| niclosamide    | 5 $\mu$ M, 10 $\mu$ M   | 10 $\mu$ M found to stabilize BECN-1 <sup>8</sup> . Concentration was reduced to 5 $\mu$ M when this was determined to be sufficient for antiviral activity. |
| rapamycin      | 300 nM                  | 300 nM is sufficient to inhibit mTORC1 <sup>19</sup> .                                                                                                       |
| SMIP-004       | 10 $\mu$ M              | 10 $\mu$ M found to stabilize BECN-1 <sup>8</sup> .                                                                                                          |
| SAR405         | 1 $\mu$ M               | 1 $\mu$ M is well above the inhibitory concentration for PIK3C3 <sup>20</sup> .                                                                              |
| spermidine     | 10 $\mu$ M, 100 $\mu$ M | 100 $\mu$ M was sufficient to induce autophagy in mammalian cells <sup>21</sup> .                                                                            |
| spermine       | 10 $\mu$ M, 100 $\mu$ M | 100 $\mu$ M was sufficient to induce autophagy in mammalian cells <sup>21</sup> .                                                                            |
| valinomycin    | 5 $\mu$ M               | 5 $\mu$ M found to stabilize Beclin-1 <sup>8</sup> .                                                                                                         |

**Supplementary Table 10. Overview IC and BZ metabolites**

|                       |                              |
|-----------------------|------------------------------|
| <b>BZ metabolites</b> |                              |
| AABA                  | $\alpha$ -aminobutyric acid  |
| adenosine             | adenosine                    |
| ala                   | alanine                      |
| arg                   | arginine                     |
| asn                   | asparagine                   |
| asp                   | aspartic acid                |
| cam                   | carnosine                    |
| citru                 | citrulline                   |
| cr                    | creatine                     |
| cys                   | cysteine                     |
| cysgly                | cysteinylglycine             |
| cyst                  | cysteine                     |
| GABA                  | $\gamma$ -aminobutyric acid  |
| glc                   | glucose                      |
| ghn                   | glutamine                    |
| glu                   | glutamic acid                |
| gly                   | glycine                      |
| GSH                   | glutathione (reduced)        |
| GSSG                  | glutathione (oxidized)       |
| hcys                  | homocysteine                 |
| his                   | histidine                    |
| hyp                   | 4-hydroxyproline             |
| ile                   | isoleucine                   |
| leu                   | leucine                      |
| lys                   | lysine                       |
| met                   | methionine                   |
| MTA                   | 5'-methylthioadenosine       |
| NAcput                | N-acetylputrescine           |
| NAcspd                | N-acetylspermidine           |
| NAcspm                | N-acetylspermine             |
| orn                   | ornithine                    |
| phe                   | phenylalanine                |
| pip. acid             | pipecolic acid               |
| pro                   | proline                      |
| put                   | putrescine                   |
| SAH                   | S-adenosylhomocysteine       |
| SAM                   | S-adenosylmethionine         |
| ser                   | serine                       |
| spd                   | spermidine                   |
| spm                   | spermine                     |
| tau                   | taurine                      |
| thr                   | threonine                    |
| trp                   | tryptophan                   |
| tyr                   | tyrosine                     |
| val                   | valine                       |
| $\beta$ -ala          | $\beta$ -alanine             |
| $\gamma$ -glucys      | $\gamma$ -glutamylcystein    |
| <b>IC metabolites</b> |                              |
| 1,3-BPG               | 1,3-bisphosphoglyceric acid  |
| 3-PGA                 | 3-phosphoglyceric acid       |
| 6-PG                  | 6-phosphogluconic acid       |
| aco                   | aconitic acid                |
| ADP                   | adenosine diphosphate        |
| AMP                   | adenosine monophosphate      |
| ATP                   | adenosine triphosphate       |
| caa                   | carbamoyl aspartic acid      |
| CDP                   | cytidine diphosphate         |
| cit                   | citric acid                  |
| CMP                   | cytidine monophosphate       |
| CTP                   | cytidine triphosphate        |
| dATP                  | deoxyadenosine triphosphate  |
| dCTP                  | deoxycytidine triphosphate   |
| dTMP                  | deoxythymidine monophosphate |
| dTTP                  | deoxythymidine triphosphate  |
| F-1,6-P               | fructose-1,6-bisphosphate    |
| F-1-P                 | fructose-1-phosphate         |
| F-6-P                 | fructose-6-phosphate         |
| fum                   | fumaric acid                 |
| G-1-P                 | glucose-1-phosphate          |
| G-3-P                 | glycerol-3-phosphate         |

|              |                             |
|--------------|-----------------------------|
| G-6-P        | glucose-6-phosphate         |
| GDP          | guanosine diphosphate       |
| GMP          | guanosine monophosphate     |
| GTP          | guanosine triphosphate      |
| icit         | isocitric acid              |
| IMP          | inosine monophosphate       |
| lac          | lactic acid                 |
| mal          | malic acid                  |
| orot. acid   | orotic acid                 |
| pan          | pantothenate                |
| PEP          | phosphoenolpyruvic acid     |
| pyr          | pyruvic acid                |
| S-7-P        | sedoheptulose-7-phosphate   |
| suc          | succinic acid               |
| UDP          | uridine diphosphate         |
| UDP-Gal      | UDP-galactose               |
| UDP-GalNAc   | UDP-N-acetylgalactosamine   |
| UDP-Glc      | UDP-glucose                 |
| UDP-GlcNAc   | UDP-N-acetylglucosamine     |
| UMP          | uridine monophosphate       |
| UTP          | uridine triphosphate        |
| $\alpha$ -KG | $\alpha$ -ketoglutaric acid |

**Supplementary Table 11. Overview of applied oligonucleotides**

| Name         | Sequence                   | Source             |
|--------------|----------------------------|--------------------|
| p62_f        | GAAACTGGAGCCCACGTC         | in-house           |
| p62_r        | TATCCACTT CAATGCCAGAGG     |                    |
| p62_p        | AATCAGCTGCTGGTCCATCGGAGGA  |                    |
| hTBP_f       | GCTGCGGTAATCATGAGGATAAG    | Ref. <sup>22</sup> |
| hTBP_r       | TTCTGGGAAAATGGTGTGCA       |                    |
| hTBP_p       | AGCCACGAACCACGGCACTGATTTT  |                    |
| E_Sarbeco_F  | ACAGGTACGTTAATAGTTAATAGCGT | Ref. <sup>23</sup> |
| E_Sarbeco_R  | ATATTGCAGCAGTACGCACACA     |                    |
| E_Sarbeco_P1 | ACACTAGCCATCCTTACTGCGCTTCG |                    |
| ATG5_f       | GCTCTTCCTTGGAACATCACAG     | in-house           |
| ATG5_r       | TCCCATCCAGAGTTGCTTGTG      |                    |
| ATG5_p       | ACCTTCTGCACTGTCCATCTAAGGA  |                    |
| ATG7_f       | TGCCAGCTCGCTTAACATTG       | in-house           |
| ATG7_r       | AAAGACTCGAGTGTGTTGGTG      |                    |
| ATG7_p       | AGTGCTTTTGACATGAGTGCTCCCA  |                    |
| BECN1_f      | TGAGTGTGAGAACTACAAACGC     | in-house           |
| BECN1_r      | AGCCTGGACCTTCTCGAG         |                    |
| BECN1_p      | TCTTTTCCACGTCTTCCAGCTCCTG  |                    |
| FIP200_f     | GTGATCGTCCACCTGCTATTC      | in-house           |
| FIP200_r     | TCTTGGCAACTTCATACATTCC     |                    |
| FIP200_p     | CAAGCTGTGTCCTTGAAGCAACAGT  |                    |



## References (SUPPLEMENTARY data)

- 1 Narayanan, K. *et al.* Severe acute respiratory syndrome coronavirus nsp1 suppresses host gene expression, including that of type I interferon, in infected cells. *J Virol* **82**, 4471-4479, doi:10.1128/JVI.02472-07 (2008).
- 2 Schubert, K. *et al.* SARS-CoV-2 Nsp1 binds the ribosomal mRNA channel to inhibit translation. *Nat Struct Mol Biol* **27**, 959-966, doi:10.1038/s41594-020-0511-8 (2020).
- 3 Tanaka, T., Kamitani, W., DeDiego, M. L., Enjuanes, L. & Matsuura, Y. Severe acute respiratory syndrome coronavirus nsp1 facilitates efficient propagation in cells through a specific translational shutoff of host mRNA. *J Virol* **86**, 11128-11137, doi:10.1128/JVI.01700-12 (2012).
- 4 Thoms, M. *et al.* Structural basis for translational shutdown and immune evasion by the Nsp1 protein of SARS-CoV-2. *Science* **369**, 1249-1255, doi:10.1126/science.abc8665 (2020).
- 5 Klann, K., Tascher, G. & Munch, C. Functional Translatome Proteomics Reveal Converging and Dose-Dependent Regulation by mTORC1 and eIF2alpha. *Mol Cell* **77**, 913-925 e914, doi:10.1016/j.molcel.2019.11.010 (2020).
- 6 Angelini, M. M., Akhlaghpour, M., Neuman, B. W. & Buchmeier, M. J. Severe acute respiratory syndrome coronavirus nonstructural proteins 3, 4, and 6 induce double-membrane vesicles. *mBio* **4**, doi:10.1128/mBio.00524-13 (2013).
- 7 Oudshoorn, D. *et al.* Expression and Cleavage of Middle East Respiratory Syndrome Coronavirus nsp3-4 Polyprotein Induce the Formation of Double-Membrane Vesicles That Mimic Those Associated with Coronaviral RNA Replication. *mBio* **8**, doi:10.1128/mBio.01658-17 (2017).
- 8 Gassen, N. C. *et al.* SKP2 attenuates autophagy through Beclin1-ubiquitination and its inhibition reduces MERS-Coronavirus infection. *Nature Communications* **10**, 1-16 (2019).
- 9 Hayn, M. *et al.* Systematic functional analysis of SARS-CoV-2 proteins uncovers viral innate immune antagonists and remaining vulnerabilities. *Cell Rep*, 109126, doi:10.1016/j.celrep.2021.109126 (2021).
- 10 Zhang, Y. *et al.* The SARS-CoV-2 protein ORF3a inhibits fusion of autophagosomes with lysosomes. *Cell Discov* **7**, 31, doi:10.1038/s41421-021-00268-z (2021).
- 11 Miao, G. *et al.* ORF3a of the COVID-19 virus SARS-CoV-2 blocks HOPS complex-mediated assembly of the SNARE complex required for autolysosome formation. *Dev Cell* **56**, 427-442 e425, doi:10.1016/j.devcel.2020.12.010 (2021).
- 12 Schroeder, S. *et al.* Interferon antagonism by SARS-CoV-2: a functional study using reverse genetics. *Lancet Microbe* **2**, e210-e218, doi:10.1016/S2666-5247(21)00027-6 (2021).
- 13 Cornillez-Ty, C. T., Liao, L., Yates, J. R., 3rd, Kuhn, P. & Buchmeier, M. J. Severe acute respiratory syndrome coronavirus nonstructural protein 2 interacts with a host protein complex involved in mitochondrial biogenesis and intracellular signaling. *J Virol* **83**, 10314-10318, doi:10.1128/JVI.00842-09 (2009).
- 14 Davies, J. P., Almasy, K. M., McDonald, E. F. & Plate, L. Comparative Multiplexed Interactomics of SARS-CoV-2 and Homologous Coronavirus Nonstructural Proteins Identifies Unique and Shared Host-Cell Dependencies. *ACS Infect Dis* **6**, 3174-3189, doi:10.1021/acsinfecdis.0c00500 (2020).
- 15 Corton, J. M., Gillespie, J. G., Hawley, S. A. & Hardie, D. G. 5-Aminoimidazole-4-carboxamide ribonucleoside: a specific method for activating AMP-activated protein kinase in intact cells? *European journal of biochemistry* **229**, 558-565 (1995).
- 16 Mounce, B. C. *et al.* Inhibition of Polyamine Biosynthesis Is a Broad-Spectrum Strategy against RNA Viruses. *J Virol* **90**, 9683-9692, doi:10.1128/JVI.01347-16 (2016).
- 17 Cheng, Y. *et al.* MK-2206, a novel allosteric inhibitor of Akt, synergizes with gefitinib against malignant glioma via modulating both autophagy and apoptosis. *Molecular cancer therapeutics* **11**, 154-164 (2012).
- 18 Petherick, K. J. *et al.* Pharmacological inhibition of ULK1 kinase blocks mammalian target of rapamycin (mTOR)-dependent autophagy. *Journal of Biological Chemistry* **290**, 11376-11383 (2015).
- 19 Guertin, D. A. & Sabatini, D. M. The pharmacology of mTOR inhibition. *Sci. Signal.* **2**, pe24-pe24 (2009).

- 20 Pasquier, B. SAR405, a PIK3C3/Vps34 inhibitor that prevents autophagy and synergizes with  
MTOR inhibition in tumor cells. *Autophagy* **11**, 725-726 (2015).
- 21 Morselli, E. *et al.* Spermidine and resveratrol induce autophagy by distinct pathways converging  
on the acetylproteome. *J Cell Biol* **192**, 615-629, doi:10.1083/jcb.201008167 (2011).
- 22 Biesold, S. E. *et al.* Type I interferon reaction to viral infection in interferon-competent,  
immortalized cell lines from the African fruit bat *Eidolon helvum*. *PLoS One* **6**, e28131,  
doi:10.1371/journal.pone.0028131 (2011).
- 23 Corman, V. M. *et al.* Detection of 2019 novel coronavirus (2019-nCoV) by real-time RT-PCR.  
*Euro Surveill* **25**, doi:10.2807/1560-7917.ES.2020.25.3.2000045 (2020).
